# Supplementary material for: Naturally occurring phenylethanoids and phenylpropanoids: antimalarial potential
Source: Royal Society of Chemistry journal article supplement (doi:10.1039/d3ra04242a), 2023-01-01
Supplement: d3ra04242a1.pdf [file d3ra04242a1.pdf]

## Supplementary Material

**Table S1: A list of plant-derived phenylethanoids and phenylpropanoids with anti-viral and anti-protozoal activities**

| No.                                                                                 | Compound       | Source                                   | Structure                                                  | Activity                                                                                         | Ref.                 |
|-------------------------------------------------------------------------------------|----------------|------------------------------------------|------------------------------------------------------------|--------------------------------------------------------------------------------------------------|----------------------|
| 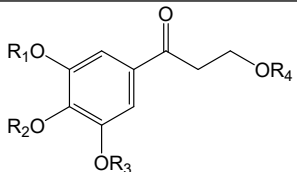  |                |                                          |                                                            |                                                                                                  |                      |
| 1                                                                                   | Feddeiketone A | <i>Daphne feddei</i> F.<br>Thymelaeaceae | $R_1 = R_2 = \text{Me}; R_3 = \text{H}; R_4 = \text{Ac}$   | Activity against HIV-1<br>EC <sub>50</sub> 3.96 µg/mL CC <sub>50</sub><br>64.5 µg/mL<br>TI 16.3  | (Lu et al.,<br>2012) |
| 2                                                                                   | Feddeiketone B | <i>Daphne feddei</i> F.<br>Thymelaeaceae | $R_1 = R_2 = \text{Me}; R_3 = R_4 = \text{H}$              | Activity against HIV-1<br>EC <sub>50</sub> 3.16 µg/mL<br>CC <sub>50</sub> 96.3 µg/mL<br>TI 30.5  | (Lu et al.,<br>2012) |
| 3                                                                                   | Feddeiketone C | <i>Daphne feddei</i> F.<br>Thymelaeaceae | $R_1 = \text{Me}; R_2 = R_3 = \text{CH}_2; R_4 = \text{H}$ | Activity against HIV-1<br>EC <sub>50</sub> 2.47 µg/mL<br>CC <sub>50</sub> 43.4 µg/mL<br>TI 17.6  | (Lu et al.,<br>2012) |
|  |                |                                          |                                                            |                                                                                                  |                      |
| 4                                                                                   | Feddeiphenol A | <i>Daphne feddei</i> F.<br>Thymelaeaceae | $R_1 = R_2 = \text{OH}; R_3 = \text{OMe}$                  | Activity against HIV-1<br>EC <sub>50</sub> 4.08 µg/mL<br>CC <sub>50</sub> 128.2 µg/mL<br>TI 31.4 | (Hu et al.,<br>2011) |

|                                                                                    |                  |                                          |                                                                                    |                                                                                                |                           |
|------------------------------------------------------------------------------------|------------------|------------------------------------------|------------------------------------------------------------------------------------|------------------------------------------------------------------------------------------------|---------------------------|
| 5                                                                                  | Feddeiphenol B   | <i>Daphne feddei</i> F.<br>Thymelaeaceae | $R_1 = R_2 = R_3 = \text{OH}$                                                      | Activity against HIV-1<br>EC <sub>50</sub> 3.24 µg/mL CC <sub>50</sub><br>132.4 µg/mL TI 40.9  | (Hu et al.,<br>2011)      |
| 6                                                                                  | Kadangustin J    | <i>Daphne feddei</i> F.<br>Thymelaeaceae | $R_1 = R_2 = \text{H}; R_3 = \text{OMe}$                                           | Activity against HIV-1<br>EC <sub>50</sub> 40.5 µg/mL CC <sub>50</sub><br>268.2 µg/mL TI 6.6   | (Hu et al.,<br>2011)      |
| 7                                                                                  | Feddeiphenol C   | <i>Daphne feddei</i> F.<br>Thymelaeaceae | 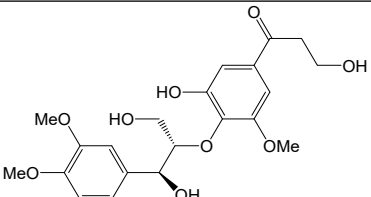 | Activity against HIV-1<br>EC <sub>50</sub> 3.58 µg/mL CC <sub>50</sub><br>244.7 µg/mL TI 68.4  | (Hu et al.,<br>2011)      |
|  |                  |                                          |                                                                                    |                                                                                                |                           |
| 8                                                                                  | (-)-Surinamensin | <i>Daphne feddei</i> F.<br>Thymelaeaceae | $R = \text{OMe}$                                                                   | Activity against HIV-1<br>EC <sub>50</sub> 18.2 µg/mL, CC <sub>50</sub><br>186.5 µg/mL TI 10.3 | (Hu et al.,<br>2011)      |
|                                                                                    |                  |                                          |                                                                                    | Activity against<br><i>Plasmodium falciparum</i>                                               | (Rye and<br>Barker, 2013) |
| 9                                                                                  | Virolin          | <i>Daphne feddei</i> F.<br>Thymelaeaceae | $R = \text{H}$                                                                     | Activity against HIV-1<br>EC <sub>50</sub> 15.2 µg/mL CC <sub>50</sub><br>225.3 µg/mL TI 14.8  | (Hu et al.,<br>2011)      |
|                                                                                    |                  |                                          |                                                                                    | Activity against<br><i>Leishmania donovani</i> and<br><i>Plasmodium falciparum</i>             | (Rye and<br>Barker, 2013) |

| 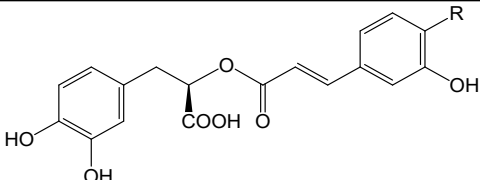 |                    |                                            |                                                                                      |                                                                                               |                                                                  |
|------------------------------------------------------------------------------------|--------------------|--------------------------------------------|--------------------------------------------------------------------------------------|-----------------------------------------------------------------------------------------------|------------------------------------------------------------------|
| 10                                                                                 | Rosmarinic acid    | <i>Daphne feddei</i> (Thymelaeaceae)       | R = OH                                                                               | Activity against HIV-1<br>EC <sub>50</sub> 5.82 µg/mL, CC <sub>50</sub> > 300 µg/mL TI > 51.5 | (Hu et al., 2011)                                                |
|                                                                                    |                    | <i>Salvia prattii</i> F. Lamiaceae         |                                                                                      | Activity against HBV                                                                          | (Dang et al., 2016);(Tsukamoto et al., 2018); (Liu et al., 2020) |
|                                                                                    |                    | <i>Rosmarinus officinalis</i> F. Lamiaceae |                                                                                      | Activity against DENV                                                                         | (Panchal et al., 2022)                                           |
|                                                                                    |                    | <i>Melissa officinalis</i> F. Lamiaceae    |                                                                                      | Activity against <i>Plasmodium falciparum</i><br>IC <sub>50</sub> 103.59 µg/ml                | (Fordjour et al., 2020)                                          |
| 11                                                                                 | Clinopodic acid A  | <i>Daphne feddei</i> F. Thymelaeaceae      | R = H                                                                                | Activity against HIV-1<br>EC <sub>50</sub> 7.47 µg/mL CC <sub>50</sub> 146.5 µg/mL TI 19.6    | (Hu et al., 2011)                                                |
| 12                                                                                 | Ethyl rosmarinate  | <i>Salvia prattii</i> F. Lamiaceae         |   | Activity against HBV activity                                                                 | (Dang et al., 2016)                                              |
| 13                                                                                 | Methyl rosmarinate | <i>Salvia prattii</i> F. Lamiaceae         |  | Activity against HBV                                                                          | (Dang et al., 2016)                                              |
|                                                                                    |                    | <i>Salvia plebeia</i> F. Lamiaceae         |                                                                                      | Activity against H1N1 neuraminidase<br>IC <sub>50</sub> 16.65 ± 0.91 µM                       | (Omrani et al., 2021)                                            |

|    |                                   |                                                                                                                                     |                                                                                      |                                                                                                                                                      |                                                      |
|----|-----------------------------------|-------------------------------------------------------------------------------------------------------------------------------------|--------------------------------------------------------------------------------------|------------------------------------------------------------------------------------------------------------------------------------------------------|------------------------------------------------------|
| 14 | <i>Trans</i> -anethole            | <i>Illicium verum</i> F.<br>Illiciaceae<br><i>Pimpinella anisum</i><br>F. Apiaceae<br><i>Foeniculum vulgare</i><br>F. Apiaceae      | 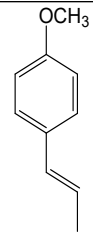  | Activity against HSV-1<br>IC <sub>50</sub> 20 ± 1.1 µg/mL                                                                                            | (Astani et al., 2011); (Ilijeva and Buchbauer, 2016) |
| 15 | Eugenol (4-allyl-2-methoxyphenol) | <i>Pimenta racemosa</i><br>F. Myrtaceae,<br><i>Cinnamomum verum</i><br>F. Lauraceae &<br><i>Syzygium aromaticum</i> F.<br>Myrtaceae |    | Growth inhibition of <i>Trypanosoma cruzi</i> , <i>Giardia lamblia</i> , and <i>Leishmania donovani</i>                                              | (Morais et al., 2014)                                |
| 16 | 1'-Acetoxychavicol acetate        | <i>Languas galanga</i><br>( <i>Alipinia galanga</i> )<br>F. Zingiberaceae                                                           |    | Activity against HIV                                                                                                                                 | (Misawa et al., 2008); (Ilijeva and Buchbauer, 2016) |
| 17 | Dillapiole                        | <i>Piper aduncum</i> F.<br>Piperaceae                                                                                               |   | Inhibitory activity against <i>Leishmania amazonensis</i> and <i>L. brasiliensis</i><br>IC <sub>50</sub> 69.3 and 59.4 µM, respectively              | (Parise-Filho et al., 2012)                          |
| 18 | Dihydrodillapiole                 | <i>Piper aduncum</i> F.<br>Piperaceae                                                                                               |  | Inhibitory activity against <i>Leishmania amazonensis</i> and <i>L. brasiliensis</i><br>IC <sub>50</sub> 99.9 µM for<br>IC <sub>50</sub> 90.5 µM for | (Parise-Filho et al., 2012)                          |
| 19 | <i>p</i> -Coumaric acid           | <i>Stereospermum acuminatissimum</i> F.<br>Bignoniaceae                                                                             |  | In-vitro and in-vivo activities against <i>Leishmaniasis amazonensis</i> with                                                                        | (Monzote et al., 2016)                               |

|    |                                |                                                 |                                                                      |                                                                                                                                                                                              |                                                              |
|----|--------------------------------|-------------------------------------------------|----------------------------------------------------------------------|----------------------------------------------------------------------------------------------------------------------------------------------------------------------------------------------|--------------------------------------------------------------|
|    |                                |                                                 |                                                                      | $IC_{50} \pm SD$ $1.5 \pm 0.5 - 9.0 \pm 1.7$ $\mu\text{g/mL}-\mu\text{M/L}$ for amastigotes and $CC50 \pm SD$ $22.5 \pm 0.7 - 136.8 \pm 0.4$ $\mu\text{g/mL}-\mu\text{M/L}$ for macrophages. |                                                              |
|    |                                |                                                 |                                                                      |                                                                                                                                                                                              |                                                              |
| 20 | Verbascoside (Acteoside)       | <i>Markhamia lutea</i> F. Bignoniaceae          | $R_1 = \text{H}; R_2 = \text{Caf}; R_3 = \text{Rha}; R_4 = \text{H}$ | Activity against RSV<br>$EC_{50}$ $0.80$ $\mu\text{g/mL}$ $IC_{50}$ $76.9$ $\mu\text{g/mL}$                                                                                                  | (Kernan et al., 1998);(Perez G., 2003); (Jansi et al., 2021) |
|    |                                | <i>Scrophularia scorodonia</i> Scrophulariaceae |                                                                      | Activity against VSV<br>Inhibition percentage of cytopathic effect of 53.6% at $500$ $\mu\text{g/mL}$                                                                                        | (Bermejo et al., 2002)                                       |
|    |                                | <i>Tecoma mollis</i> F. Bignoniaceae            |                                                                      | In vitro activity against <i>Leishmania donovani</i> with percentage of inhibition 83% ( $IC_{50}$ $30.08$ )                                                                                 | (Abdel-Mageed et al., 2012)                                  |
| 21 | Isoverbascoside (Isoacteoside) | <i>Markhamia lutea</i> F. Bignoniaceae          | $R_1 = \text{Caf}; R_2 = \text{H}; R_3 = \text{Rha}; R_4 = \text{H}$ | Activity against RSV<br>$EC_{50}$ $0.62$ $\mu\text{g/mL}$ $IC_{50}$ $51.4$ $\mu\text{g/mL}$                                                                                                  | (Kernan et al., 1998);(Perez G., 2003);(Jansi et al., 2021)  |
|    |                                | <i>Tecoma mollis</i> F. Bignoniaceae            |                                                                      | In vitro activity against <i>Leishmania donovani</i> with percentage of inhibition 78% ( $IC_{50} > 40$ )                                                                                    | (Abdel-Mageed et al., 2012)                                  |

|    |              |                                         |                                                                                       |                                                                                                                            |                                                                 |
|----|--------------|-----------------------------------------|---------------------------------------------------------------------------------------|----------------------------------------------------------------------------------------------------------------------------|-----------------------------------------------------------------|
| 22 | Echinacoside | <i>Echinacea purpurea</i> F. Asteraceae | R <sub>1</sub> = Glu; R <sub>2</sub> = Caf; R <sub>3</sub> = Rha; R <sub>4</sub> = H  | Activity against VSV                                                                                                       |                                                                 |
| 23 | Luteoside A  | <i>Markhamia lutea</i> F. Bignoniaceae  | R <sub>1</sub> = Ac; R <sub>2</sub> = Caf; R <sub>3</sub> = Rha; R <sub>4</sub> = Api | Activity against RSV<br>EC <sub>50</sub> 0.87 µg/mL IC <sub>50</sub> 77 µg/mL                                              | (Kernan et al., 1998);(Perez G., 2003);<br>(Jansi et al., 2021) |
|    |              | <i>Tecoma mollis</i> F. Bignoniaceae    |                                                                                       | Moderate antimalarial activity (45% inhibition) against chloroquine sensitive (D6) clones of <i>Plasmodium falciparum</i>  | (Abdel-Mageed et al., 2012)                                     |
| 24 | Luteoside B  | <i>Markhamia lutea</i> F. Bignoniaceae  | R <sub>1</sub> = Caf; R <sub>2</sub> = H; R <sub>3</sub> = Rha; R <sub>4</sub> = Api  | Activity against RSV<br>EC <sub>50</sub> 3.4 µg/mL IC <sub>50</sub> > 67µg/mL                                              | (Kernan et al., 1998);(Perez G., 2003);<br>(Jansi et al., 2021) |
|    |              | <i>Tecoma mollis</i> F. Bignoniaceae    |                                                                                       | High antileishmanial activity against <i>Leishmania donovani</i> with percentage of inhibition 92% (IC <sub>50</sub> 6.71) | (Abdel-Mageed et al., 2012)                                     |
| 25 | Luteoside C  | <i>Markhamia lutea</i> F. Bignoniaceae  | R <sub>1</sub> = Fer; R <sub>2</sub> = H; R <sub>3</sub> = Rha; R <sub>4</sub> = Api  | Activity against RSV<br>EC <sub>50</sub> 15.5 µg/mL IC <sub>50</sub> 189 µg/mL                                             | (Kernan et al., 1998); (Perez G., 2003)                         |

|    |                   |                                                  |                                                                                      |                                                                                                                                                                                                                                                                                                                                                                                                                                                                                          |                                                                  |
|----|-------------------|--------------------------------------------------|--------------------------------------------------------------------------------------|------------------------------------------------------------------------------------------------------------------------------------------------------------------------------------------------------------------------------------------------------------------------------------------------------------------------------------------------------------------------------------------------------------------------------------------------------------------------------------------|------------------------------------------------------------------|
| 26 | Salidroside       | <i>Phillyrea latifolia</i> F.<br>Oleaceae        | 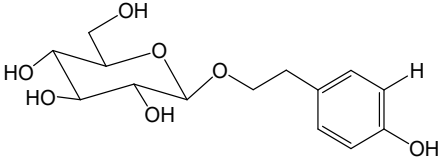   | <p>Growth inhibitory effect against the promastigotes of Sodium stibogluconate (SSG) sensitive and resistant strains of <i>L. donovani</i>.<br/>IC<sub>50</sub> of 15.54 ± 1.53 and 38.16 ± 0.86 µg/mL, respectively.</p>                                                                                                                                                                                                                                                                | (Chauhan et al., 2019)                                           |
| 27 | Calceolarioside B | <i>Digitalis purpurea</i> F.<br>Scrophulariaceae |    | <p><i>In vitro</i> antileishmanial activity (IC<sub>50</sub> = 20 µg/mL). Its <i>in vivo</i> efficacy was noted at 20 mg/kg body weight when it reduced the hepatic and splenic parasite burden by 79 and 84 %, respectively, in an established model of <i>L. donovani</i> Ag83 infected golden hamster. Furthermore, synergistic potentiations of it at 20 mg/kg body weight and SAG at 5 mg/kg body weight showed a significant reduction of hepatic and splenic parasite burden.</p> | (Poddar et al., 2008)                                            |
| 28 | Inotilone         | <i>Phellinus linteus</i> F.<br>Hymenochaetaceae  |  | <p>Inhibited H1N1 neuraminidase activity with IC<sub>50</sub> value of 29.1 µM and active against IAV/WS/33</p>                                                                                                                                                                                                                                                                                                                                                                          | (Hwang et al., 2018); (Chen et al., 2019); (Omrani et al., 2021) |

|                                                                                    |                                                      |                                                 |                                                                                    |                                                                                                                                    |                                                                  |
|------------------------------------------------------------------------------------|------------------------------------------------------|-------------------------------------------------|------------------------------------------------------------------------------------|------------------------------------------------------------------------------------------------------------------------------------|------------------------------------------------------------------|
|                                                                                    |                                                      |                                                 |                                                                                    | virus                                                                                                                              |                                                                  |
| 29                                                                                 | 4-(3,4-Dihydroxyphenyl)-3-buten-2-one                | <i>Phellinus linteus</i> F.<br>Hymenochaetaceae | 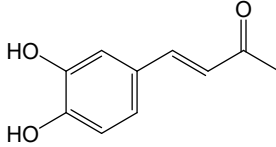 | Inhibited H1N1 neuraminidase activity with IC <sub>50</sub> value of 125.6 μM and active against IAV/WS/33 virus                   | (Hwang et al., 2018); (Chen et al., 2019); (Omrani et al., 2021) |
| 30                                                                                 | Forsythoside A                                       | <i>Forsythia suspensa</i><br>F. Oleaceae        |  | Activity against IAV                                                                                                               | (Omrani et al., 2021)                                            |
|  |                                                      |                                                 |                                                                                    |                                                                                                                                    |                                                                  |
| 31                                                                                 | Chlorogenic acid (3- <i>O</i> -Caffeoyl-quinic acid) | <i>Coffea arabica</i> F.<br>Rubiaceae           | $R_1 = R_3 = R_4 = H, R_2 = \text{Caffeoyl}$                                       | Activity against HBV                                                                                                               | (Wu, 2016)                                                       |
|                                                                                    |                                                      |                                                 |                                                                                    | Activity against poliovirus                                                                                                        | (Perez G., 2003); (Jansi et al., 2021)                           |
|                                                                                    |                                                      |                                                 |                                                                                    | Activity against HBV DNA replication<br>IC <sub>50</sub> 5.5 μM (SI >115.0)                                                        | (Zhao et al., 2014)                                              |
|                                                                                    | <i>Artemisia capillaris</i><br>F. Asteraceae         |                                                 |                                                                                    | It inhibits the secretion of HBsAg, HBeAg, and the replication of HBV-DNA on Hep G 2.2.15 cells at the concentration of 100 μg/mL. | (Liu et al., 2020)                                               |
|                                                                                    | <i>Lonicera japonica</i><br>F. Caprifoliaceae        |                                                 |                                                                                    |                                                                                                                                    |                                                                  |



|    |                                     |                                               |                                                                                     |                                                                                                                           |                         |
|----|-------------------------------------|-----------------------------------------------|-------------------------------------------------------------------------------------|---------------------------------------------------------------------------------------------------------------------------|-------------------------|
|    |                                     |                                               |                                                                                     | Moderate activity against <i>Plasmodium falciparum</i><br>IC <sub>50</sub> 105 µg/ml                                      | (Fordjour et al., 2020) |
| 32 | Chlorogenic acid methyl ester       | <i>Artemisia capillaris</i><br>F. Asteraceae  | R <sub>1</sub> = Me; R <sub>2</sub> = Caffeoyl; R <sub>3</sub> = R <sub>4</sub> = H | Activity against HBV DNA replication<br>IC <sub>50</sub> 272.3 µM (SI > 6.2)                                              | (Zhao et al., 2014)     |
| 33 | Cryptochlorogenic acid              | <i>Lonicera japonica</i><br>F. Caprifoliaceae | R <sub>1</sub> = R <sub>2</sub> =R <sub>4</sub> = H, R <sub>3</sub> = Caffeoyl      | Anti-HBV activity                                                                                                         | (Liu et al., 2020)      |
|    |                                     | <i>Artemisia capillaris</i><br>F. Asteraceae  |                                                                                     | Potent activity against HBV DNA replication<br>IC <sub>50</sub> 13.7 µM (SI > 115.0)                                      |                         |
| 34 | Cryptochlorogenic acid methyl ester | <i>Artemisia capillaris</i><br>F. Asteraceae  | R <sub>1</sub> = Me; R <sub>2</sub> =R <sub>4</sub> = H; R <sub>3</sub> = Caffeoyl  | Activity against HBV DNA replication<br>IC <sub>50</sub> 175.3 µM (SI > 11.2)                                             | (Zhao et al., 2014)     |
| 35 | Neochlorogenic acid                 | <i>Lonicera japonica</i><br>F. Caprifoliaceae | R <sub>1</sub> = R <sub>2</sub> =R <sub>3</sub> = H; R <sub>4</sub> = Caffeoyl      | Activity against HBV                                                                                                      | (Liu et al., 2020)      |
|    |                                     | <i>Artemisia capillaris</i><br>F. Asteraceae  |                                                                                     | Activity against HBV DNA replication<br>IC <sub>50</sub> 7.3 µM (SI > 249.9)                                              | (Zhao et al., 2014)     |
| 36 | Neochlorogenic acid methyl ester    | <i>Artemisia capillaris</i><br>F. Asteraceae  | R <sub>1</sub> = Me; R <sub>2</sub> =R <sub>3</sub> = H; R <sub>4</sub> = Caffeoyl  | Activity against HBV DNA replication<br>IC <sub>50</sub> 144.7 µM (SI > 20.2)                                             | (Zhao et al., 2014)     |
| 37 | 3,5-Di-O-caffeoylquinic acid        | <i>Lactuca indica</i> F.<br>Asteraceae        | R <sub>1</sub> = R <sub>3</sub> = H; R <sub>2</sub> =R <sub>4</sub> = Caffeoyl      | Anti-HBV activity                                                                                                         | (Wu, 2016)              |
|    |                                     | <i>Lonicera japonica</i><br>F. Caprifoliaceae |                                                                                     | Activity against the secretions of HBsAg and HBeAg                                                                        | (Liu et al., 2020)      |
|    |                                     | <i>Artemisia capillaris</i><br>F. Asteraceae  |                                                                                     | Inhibited HBV DNA replication IC <sub>50</sub> 6.4 µM (SI > 256.1).<br>Activity against the secretions of HBsAg and HBeAg | (Zhao et al., 2014)     |

|    |                                                   |                                                    |                                                                                      |                                                                                                                                     |                                        |
|----|---------------------------------------------------|----------------------------------------------------|--------------------------------------------------------------------------------------|-------------------------------------------------------------------------------------------------------------------------------------|----------------------------------------|
| 38 | 4,5- <i>O</i> -Dicaffeoylquinic acid              | <i>Lonicera japonica</i> F. Caprifoliaceae         | $R_1 = R_2 = H; R_3 = R_4 = \text{Caffeoyl}$                                         | Activity against HBV and secretions of HBsAg and HBeAg                                                                              | (Liu et al., 2020)                     |
|    |                                                   | <i>Artemisia capillaris</i> F. Asteraceae          |                                                                                      | Inhibited HBV DNA replication $IC_{50}$ 9.8 $\mu\text{M}$ (SI > 184.8). Moderate activity against the secretions of HBsAg and HBeAg | (Zhao et al., 2014)                    |
| 39 | 3,4-Di- <i>O</i> -caffeoylquinic acid             | <i>Lactuca indica</i> F. Asteraceae                | $R_1 = R_4 = H; R_2 = R_3 = \text{Caffeoyl}$                                         | Anti-HBV activity                                                                                                                   | (Wu, 2016)                             |
|    |                                                   | <i>Lonicera japonica</i> F. Caprifoliaceae         |                                                                                      | Potent activity against HBV-DNA replication $IC_{50}$ 5:5±0:9-13:7±1:3 $\mu\text{M}$                                                | (Liu et al., 2020)                     |
|    |                                                   | <i>Artemisia capillaris</i> F. Asteraceae          |                                                                                      | inhibited HBV DNA replication $IC_{50}$ 6.1 $\mu\text{M}$ (SI > 184.8). Activity against the secretions of HBsAg and HBeAg          | (Zhao et al., 2014)                    |
| 40 | 3,4,5-Tri- <i>O</i> -caffeoylquinic acid          | <i>Securidata longipedunculata</i> F. Polygalaceae | $R_1 = H; R_2 = R_3 = R_4 = \text{Caffeoyl}$                                         | Anti- HIV activity                                                                                                                  | (Perez G., 2003)                       |
| 41 | 3,5-Di- <i>O</i> -caffeoyl-mucoquinic acid        | <i>Lactuca indica</i> F. Asteraceae                | 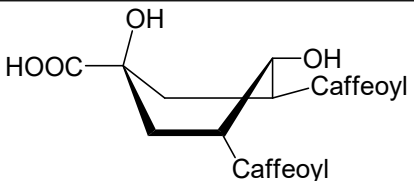 | Activity against HBV                                                                                                                | (Wu, 2016)                             |
| 42 | 2- <i>O</i> -Caffeoyl-(+)-allohydroxy-citric acid | <i>Spondias mombin</i> F. Anacardiaceae            |  | Activity against Coxsackie and HSV                                                                                                  | (Perez G., 2003); (Jansi et al., 2021) |

|    |                                                           |                                                                                                 |                                                                                      |                                                                                        |                                        |
|----|-----------------------------------------------------------|-------------------------------------------------------------------------------------------------|--------------------------------------------------------------------------------------|----------------------------------------------------------------------------------------|----------------------------------------|
| 43 | 5- <i>O</i> -( <i>E</i> )- <i>p</i> -Coumaroylquinic acid | <i>Lactuca indica</i> F.<br>Asteraceae                                                          | 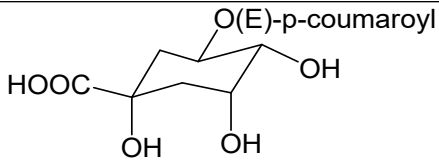   | Anti-HBV activity                                                                      | (Wu, 2016)                             |
| 44 | Caffeic acid                                              | <i>Coffea arabica</i> F.<br>Rubiaceae                                                           |    | Activity against HBV                                                                   | (Wu, 2016)                             |
|    |                                                           | <i>Salvia prattii</i> F.<br>Lamiaceae                                                           |                                                                                      | Activity against HSV, influenza, vaccinia, and polio viruses                           | (Jansi et al., 2021); (Perez G., 2003) |
| 45 | 3-Methyl-but-2-enyl caffeate                              | <i>Populus nigra</i> F.<br>Salicaceae                                                           |    | Activity against HSV-1                                                                 | (Jansi et al., 2021); (Perez G., 2003) |
| 46 | Ferulic acid                                              | <i>Eleutherococcus senticosus</i> F.<br>Araliaceae; <i>Populus balsamifera</i> F.<br>Salicaceae |    | Moderate activity against <i>Plasmodium falciparum</i><br>IC <sub>50</sub> 93.36 µg/ml | (Fordjour et al., 2020)                |
| 47 | Eugenyl- <i>O</i> -β-D-glucoside                          | <i>Salvia prattii</i> F.<br>Lamiaceae                                                           |   | Activity against HBV                                                                   | (Dang et al., 2016)                    |
| 48 | Erigeside II                                              | <i>Salvia prattii</i> F.<br>Lamiaceae                                                           |  | Activity against HBV                                                                   | (Dang et al., 2016)                    |

|    |                                                                        |                                                                                   |                                                                                       |                        |                                                                    |
|----|------------------------------------------------------------------------|-----------------------------------------------------------------------------------|---------------------------------------------------------------------------------------|------------------------|--------------------------------------------------------------------|
| 49 | Eugenyl- $\beta$ -rutinoside                                           | <i>Salvia prattii</i> F.<br>Lamiaceae                                             | 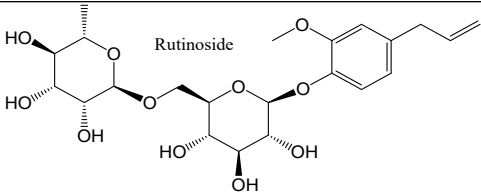    | Activity against HBV   | (Dang et al., 2016)                                                |
| 50 | Shimobashiric acid B                                                   | <i>Salvia prattii</i> F.<br>Lamiaceae                                             |     | Activity against HBV   | (Dang et al., 2016)                                                |
| 51 | 3-(6-Feruloyl- $\beta$ -D-glucopyranosyl)-rosmarinic acid              | <i>Salvia prattii</i> F.<br>Lamiaceae                                             |     | Activity against HBV   | (Dang et al., 2016)                                                |
| 52 | L-Chicoric acid (also known as cichoric acid; dicaffeoyltartaric acid) | <i>Chicorium intybus</i> F. Asteraceae<br><i>Echinacea purpurea</i> F. Asteraceae |     | Activity against HIV-1 | (Pluymers et al., 2001);(Lee and Scagel, 2013); (Liu et al., 2020) |
|    |                                                                        | <i>Echinacea pallida</i> F. Asteraceae                                            |                                                                                       | Anti-VSV activity      | (Pan et al., 2003)                                                 |
| 53 | Dehydrozingerone                                                       | <i>Swertia patens</i> F.<br>Gentianaceae                                          |  | Activity against HBV   | (Liu et al., 2020)                                                 |

|    |                                                    |                                                |                                                                                      |                                 |                                        |
|----|----------------------------------------------------|------------------------------------------------|--------------------------------------------------------------------------------------|---------------------------------|----------------------------------------|
| 54 | Di- <i>E</i> -caffeoyl- <i>meso</i> -tartaric acid | <i>Lactuca indica</i> F.<br>Asteraceae         | 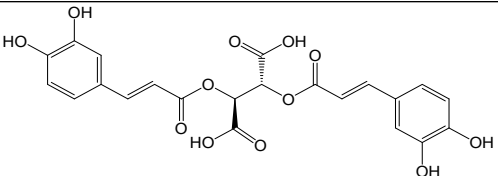   | Activity against HBV            | (Kim et al., 2010)                     |
| 55 | 2,6-Dihydroxy-methoxyisobutylrophenone             | <i>Kunzea sinclairii</i> F.<br>Myrtaceae       |    | Activity against HSV-1 and PV-1 | (Bloor, 1992)                          |
| 56 | 4,6-Dihydroxymethoxyisobutylrophenone              | <i>Kunzea sinclairii</i> F.<br>Myrtaceae       |    | Activity against HSV-1 and PV-1 | (Bloor, 1992)                          |
| 57 | Tetradecyl ferulate                                | <i>Ocimum sanctum</i> F.<br>Lamiaceae          |    | Anti-HIV-1 activity             | (Neelam et al., 2020)                  |
| 58 | Usneoidone E                                       | <i>Cystoseira usneoides</i> F.<br>Phaeophyceae |   | Antiviral activity              | (Jansi et al., 2021); (Perez G., 2003) |
| 59 | Usneoidone Z                                       | <i>Cystoseira usneoides</i> F.<br>Phaeophyceae |  | Antiviral activity              | (Jansi et al., 2021); (Perez G., 2003) |

|    |                                                         |                                               |                                                                                      |                                                                                                                                                                                                   |                                                       |
|----|---------------------------------------------------------|-----------------------------------------------|--------------------------------------------------------------------------------------|---------------------------------------------------------------------------------------------------------------------------------------------------------------------------------------------------|-------------------------------------------------------|
| 60 | (+)-Dehydrodiconiferyl alcohol                          | <i>Swertia patens</i> F.<br>Gentianaceae      | 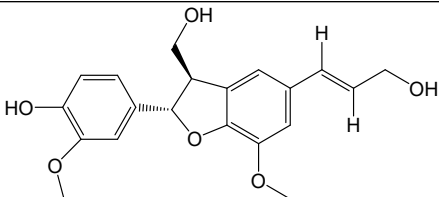   | Activity against HBV                                                                                                                                                                              | (Liu et al., 2020)                                    |
| 61 | Niranthin                                               | <i>Phyllanthus niruri</i><br>F. Euphorbiaceae |    | Inhibited HBV antigen secretion in HepG2.2.15 cells<br>IC <sub>50</sub> 15.6 µmol/L for HBsAg<br>IC <sub>50</sub> 25.1 µmol/L for HBeAg                                                           | (Wu, 2016);<br>(Cui et al., 2020); (Liu et al., 2020) |
|    |                                                         | <i>Phyllanthus amarus</i><br>F. Euphorbiaceae |                                                                                      | Potent activity against <i>Leishmania donovani</i>                                                                                                                                                | (Chowdhury et al., 2012)                              |
| 62 | Nordihydroguaiaretic Acid (NDGA)                        | <i>Larrea tridentata</i> F.<br>Zygophyllaceae |    | Anti- DENV, HCV, WNV and ZIKV, IAV, suppress the replication of IAV                                                                                                                               | (Cui et al., 2020); (Xu et al., 2022)                 |
|    |                                                         |                                               |                                                                                      | Active against <i>Trypanosoma brucei rhodesiense</i> , <i>T. cruzi</i> , <i>Leishmania donovani</i> and <i>Plasmodium falciparum</i><br>IC <sub>50</sub> 4.5, 33.1, 12.0 and 7.7 µM, respectively | (Schmidt et al., 2012)                                |
| 63 | Tetra- <i>O</i> -methyl nordihydroguaiaretic acid (TMP) | <i>Larrea tridentata</i> F.<br>Zygophyllaceae |  | It inhibited the infection of WNV and ZIKA, Poxvirus growth and it has antiviral activity against HSV and HIV.                                                                                    | (Cui et al., 2020)                                    |

|    |                                             |                                                   |                                                                                      |                                                                                                |                                             |
|----|---------------------------------------------|---------------------------------------------------|--------------------------------------------------------------------------------------|------------------------------------------------------------------------------------------------|---------------------------------------------|
|    |                                             | <i>Schisandra propinqua</i> F.<br>Schisandraceae  |                                                                                      | Anti-HIV-1 with EC <sub>50</sub><br>14.8 μM                                                    | (Xu et al.,<br>2022)                        |
| 64 | Secoisolariciresinol dimethyl ether acetate | <i>Justicia patentiflora</i><br>F. Acanthaceae    | 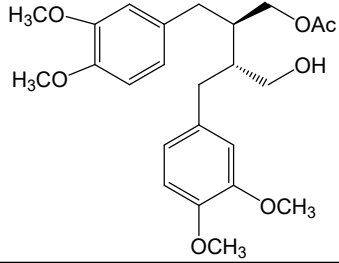   | Anti-HIV-1 activity with<br>an IC <sub>50</sub> value of 5.27<br>μmol/L and SI value of<br>2.2 | (Xu et al.,<br>2019)                        |
| 65 | 3,3'-Dihydroxy-4,4',5,5'-tetramethoxylignan | <i>Schisandra rubriflora</i> F.<br>Schisandraceae |    | Anti- HIV-1IIB induced<br>syncytium formation with<br>an EC <sub>50</sub> 5.8 μM<br>TI 4.46    | (Xu et al.,<br>2022)                        |
| 66 | Kadangustin H                               | <i>Kadsura angustifolia</i> F.<br>Schisandraceae  |   | Anti-HIV-1<br>EC <sub>50</sub> 27.0 μM                                                         | (Gao et al.,<br>2008); (Xu et<br>al., 2022) |
| 67 | Kadangustin I                               | <i>Kadsura angustifolia</i> F.<br>Schisandraceae  |  | Anti-HIV-1<br>EC <sub>50</sub> 21.5 μM                                                         | (Gao et al.,<br>2008); (Xu et<br>al., 2022) |

|    |                  |                                                                             |                                                                                    |                                                                                                                                 |                                        |
|----|------------------|-----------------------------------------------------------------------------|------------------------------------------------------------------------------------|---------------------------------------------------------------------------------------------------------------------------------|----------------------------------------|
| 68 | Tiegusanin N     | <i>Schisandra propinqua</i> F.<br>Schisandraceae                            | 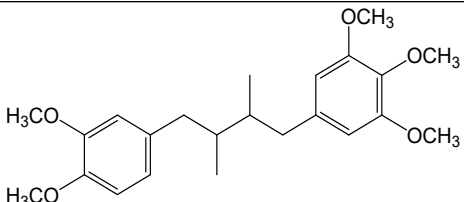 | Anti-HIV-1<br>EC <sub>50</sub> 9.4 μM                                                                                           | (Li et al., 2009); (Xu et al., 2022)   |
| 69 | Ganschisdandrine | <i>Schisandra sphenanthera</i> F.<br>Schisandraceae                         |  | Active against HSV-2 and adenovirus<br>(SI = 16.93)                                                                             | (Song et al., 2013)                    |
| 70 | Diphyllin        | <i>Justicia patentiflora</i> F.<br>Acanthaceae                              |  | Active against VSV, influenza virus and HIV-1<br>IC <sub>50</sub> 0.38 μmol/L (SI = 5.3)                                        | (Xu et al., 2019)<br>(Xu et al., 2022) |
|    |                  | <i>Haplophyllum alberti-regelii</i> and <i>H. perforatum</i> F.<br>Rutaceae |                                                                                    | It has broad-spectrum antiviral activity e.g. it blocked ZIKAV infection in HT1080 cells<br>IC <sub>50</sub> ~0.06 μM           | (Cui et al., 2020)                     |
|    |                  | <i>Haplophyllum bucharicum</i> F.<br>Rutaceae                               |                                                                                    | Antiviral activity with MIC 0.66 μM against VSV and v-ATPase blocker against influenza virus with IC <sub>50</sub> 0.04–0.49 μM | (Xu et al., 2022)                      |
|    |                  |                                                                             |                                                                                    | In vitro activity against <i>Leishmania infantum</i> activity<br>IC <sub>50</sub> = 14.4 μM                                     | (Di Giorgio et al., 2005)              |



|    |                                          |                                                |                                                                                      |                                                                                                                                  |                    |
|----|------------------------------------------|------------------------------------------------|--------------------------------------------------------------------------------------|----------------------------------------------------------------------------------------------------------------------------------|--------------------|
| 71 | Nirtetralin B                            | <i>Phyllanthus niruri</i><br>F. Euphorbiaceae  | 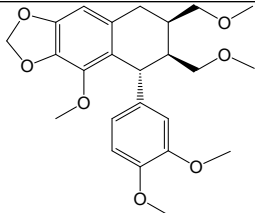   | Inhibited HBV antigen secretion in HepG2.2.15 cells with IC <sub>50</sub> 17.4 and 63.9 μmol/L for HBsAg and HBeAg, respectively | (Wu, 2016)         |
| 72 | Procumbenoside A                         | <i>Justicia patentiflora</i><br>F. Acanthaceae |    | Inhibitory activity against HIV-1 with IC <sub>50</sub> values of 4.95 0.38 μmol/L (SI > 6.2)                                    | (Xu et al., 2019)  |
| 73 | Globoidnan A                             | <i>Eucalyptus globoidea</i> F.<br>Myrtaceae    |   | Active against HIV integrase<br>EC <sub>50</sub> 0.64 μM                                                                         | (Xu et al., 2022)  |
| 74 | (+)-Cycloolivil-4'-O-β-D-glucopyranoside | <i>Swertia chirayita</i> F.<br>Gentianaceae    |  | Anti-HBV                                                                                                                         | (Liu et al., 2020) |
|    |                                          |                                                |                                                                                      | Inhibitory effect on the HBsAg and HBeAg secretion IC <sub>50</sub> 0.31 ± 0.045 mmol/L (SI = 4.29) and 0.77 ± 0.076 mmol/L      | (Wu, 2016)         |

|    |                                                                 |                                                    |                                                                                     |                                                                                                                                                                                                                                          |                                                              |
|----|-----------------------------------------------------------------|----------------------------------------------------|-------------------------------------------------------------------------------------|------------------------------------------------------------------------------------------------------------------------------------------------------------------------------------------------------------------------------------------|--------------------------------------------------------------|
|    |                                                                 |                                                    |                                                                                     | (SI = 1.75), respectively.<br>Also, it inhibits the replication of HBV DNA<br>IC <sub>50</sub> 0.29 ± 0.034 mmol/L<br>(SI = 4.66)                                                                                                        |                                                              |
| 75 | Phyllamycin B                                                   | <i>Phyllanthus myrtifolius</i> F.<br>Euphorbiaceae | 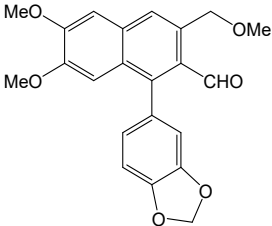  | Active against HIV-1<br>EC <sub>50</sub> 3.5 μM                                                                                                                                                                                          | (Xu et al., 2022)                                            |
| 76 | Retrojusticidin B                                               | <i>Phyllanthus myrtifolius</i> F.<br>Euphorbiaceae |   | Active against HIV-1<br>EC <sub>50</sub> 5.5 μM                                                                                                                                                                                          | (Xu et al., 2022)                                            |
| 77 | 6-Deoxyglucose-diphyllin (DGP)<br>also known as Patentiflorin A | <i>Justicia gendarussa</i><br>F. Acanthaceae       |  | Potently inhibits a broad spectrum of HIV-1 strains including some resistant strains EC <sub>50</sub> 15–37 nM (AZT: 77–95 nM) and mosquito-borne flavivirus such as ZIKV, DENV1, TBEV, WNV, JEV and EBV<br>EC <sub>50</sub> 0.12–1.0 nM | (Zhang et al., 2017b); (Cui et al., 2020); (Xu et al., 2022) |

|    |                       |                                                                     |                                                                                      |                                                                                                                                                                                                                                                                                                                                                                                                                                                                  |                                 |
|----|-----------------------|---------------------------------------------------------------------|--------------------------------------------------------------------------------------|------------------------------------------------------------------------------------------------------------------------------------------------------------------------------------------------------------------------------------------------------------------------------------------------------------------------------------------------------------------------------------------------------------------------------------------------------------------|---------------------------------|
| 78 | Podophyllotoxin       | <i>Podophyllum versipelle</i> & <i>P. peltatum</i> F. Berberidaceae | 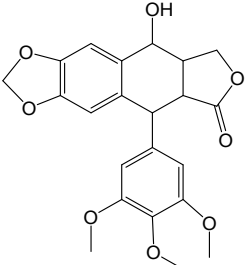   | It is used as topical treatment for venereal warts ( <i>Condyloma acuminatum</i> ), which is caused by <i>Papilloma</i> virus.                                                                                                                                                                                                                                                                                                                                   | (Cui et al., 2020)              |
| 79 | Justiprocumin B       | <i>Justicia gendarussa</i> F. Acanthaceae                           |    | <p>Potent activity against a broad spectrum of HIV strains<br/> <math>IC_{50}</math> 15-21 nM (AZT, <math>IC_{50}</math> 77-95 nM). Also, it displayed potent inhibitory activity against the NRTI (nucleoside reverse transcriptase inhibitor)-resistant isolate (HIV-1<sub>1617-1</sub>) of the analogue (AZT) as well as the NNRTI (non-nucleoside reverse transcriptase inhibitor)-resistant isolate (HIV-1<sub>N119</sub>) of the analogue (nevaripine)</p> | (Zhang et al., 2017a)           |
| 80 | Helioxanthin (HE-145) | <i>Taiwania cryptomerioides</i> F. Taxodiaceae                      |  | Inhibits the gene expression and replication of HBV in HCC cells                                                                                                                                                                                                                                                                                                                                                                                                 | (Xu et al., 2022)<br>(Wu, 2016) |

|    |                                               |                                                  |                                                                                    |                                                                                                                                                                                                                                                   |                                                                                  |
|----|-----------------------------------------------|--------------------------------------------------|------------------------------------------------------------------------------------|---------------------------------------------------------------------------------------------------------------------------------------------------------------------------------------------------------------------------------------------------|----------------------------------------------------------------------------------|
|    |                                               |                                                  |                                                                                    | Active against HBV EC <sub>50</sub><br>1 μM                                                                                                                                                                                                       | (Xu et al.,<br>2022)                                                             |
| 81 | Sinensisin A                                  | <i>Schisandra propinqua</i> F.<br>Schisandraceae | 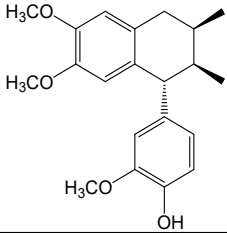 | Active against HIV-1<br>EC <sub>50</sub> 4.5 μM<br>TI 6.7                                                                                                                                                                                         | (Xu et al.,<br>2022)                                                             |
|    |                                               |                                                  |  |                                                                                                                                                                                                                                                   |                                                                                  |
| 82 | (-)-Isolariciresinol                          | <i>Streblus asper</i> F.<br>Moraceae             | R <sub>1</sub> = R <sub>2</sub> = R <sub>3</sub> = H                               | Active against HBV IC <sub>50</sub><br>3.67 and 14.67 μM, for<br>HBsAg and HBeAg,<br>respectively with no<br>cytotoxicity                                                                                                                         | (Li et al.,<br>2012) ;(Wu,<br>2016) ;(Liu et<br>al., 2020); (Xu<br>et al., 2022) |
| 83 | 9-β-<br>Xylopyranosyl(-)-<br>isolariciresinol | <i>Streblus asper</i> F.<br>Moraceae             | R <sub>1</sub> = R <sub>2</sub> = H; R <sub>3</sub> = Xyl                          | Anti-HBsAg EC <sub>50</sub> 6.98<br>μM, anti-HBeAg EC <sub>50</sub><br>26.74 μM.<br>It inhibited the<br>expression of HBsAg and<br>HBeAg with EC <sub>50</sub> values<br>of 6.58 μM for HBsAg<br>(TI >2) and 24.86<br>μM (TI = 8.06) for<br>HBeAg | (Wu, 2016)<br>(Xu et al.,<br>2022)                                               |

|    |                                                                                            |                                                                                                                                                                                                                                         |                                                                                    |                                                                                                                                                                    |                                         |
|----|--------------------------------------------------------------------------------------------|-----------------------------------------------------------------------------------------------------------------------------------------------------------------------------------------------------------------------------------------|------------------------------------------------------------------------------------|--------------------------------------------------------------------------------------------------------------------------------------------------------------------|-----------------------------------------|
| 84 | 5-methoxy-9- $\beta$ -xylopyranosyl(-)-isolariciresinol                                    | <i>Streblus asper</i> F.<br>Moraceae                                                                                                                                                                                                    | $R_1 = H$ ; $R_2 = OCH_3$ ; $R_3 = Xyl$                                            | It inhibited the expression of HBsAg and HBeAg with $EC_{50}$ values of 39.56 $\mu$ M for HBsAg (TI >2) and 61.23 $\mu$ M (TI = 1.75) for HBeAg                    | (Xu et al., 2022)                       |
| 85 | (-)-8 $\epsilon$ -aristoligone (7'R,8S,8'S)-3',4,4',5-Tetramethoxy-2,7'-cyclo lignan-7-one | <i>Schisandra sphenanthera</i> F.<br>Schisandraceae                                                                                                                                                                                     | 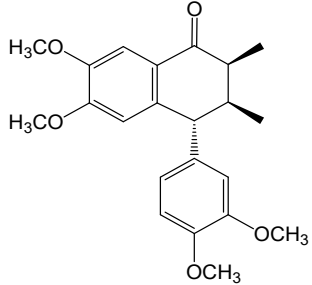 | It has moderate inhibition of HSV-2 and adenovirus                                                                                                                 | (Song et al., 2013)                     |
|    |                                                                                            | <i>Holostylis reniformis</i> (Aristolochiaceae)                                                                                                                                                                                         |                                                                                    | Activity against <i>Plasmodium falciparum</i> parasites (isolate BHZ 26/86; chloroquine $IC_{50}$ ( $\mu$ M) $0.63 \pm 0.20$ $C_{90}$ ( $\mu$ M) $2.61 \pm 0.06$ ) | (Andrade-neto et al., 2007)             |
| 86 | Hinokinin                                                                                  | <i>Chamecyparis obtuse</i> F.<br>Cupressaceae,<br><i>Phyllanthus</i> spp. F.<br>Eupobiaceae,<br><i>Aristolochia</i> F.<br>Aristolochiaceae,<br><i>Piper</i> spp. F.<br>Piperaceae, <i>Viola</i> spp. F.<br>Myristicaceae F.<br>Linaceae |  | Antiviral Anti-HBV, HIV, SARS-virus and (HCMV). Anti-SARS-CoV replication with $EC_{50} > 10 \mu$ M                                                                | (Cui et al., 2020)<br>(Xu et al., 2022) |
|    |                                                                                            | <i>Piper cubeba</i> F.<br>Piperaceae                                                                                                                                                                                                    |                                                                                    | Activity against <i>Trypanosoma cruzi</i>                                                                                                                          | (Esperandim et al., 2013)               |
|    |                                                                                            | In vitro anthelmintic activity against gastrointestinal nematodes in sheep $EC_{50}$ 68.38 $\mu$ g/mL for ovicidal activity                                                                                                             |                                                                                    | (Carlis et al., 2019)                                                                                                                                              |                                         |

|    |            |                                          |                                                                                      |                                                                                                                                                                                                                                                                               |                           |
|----|------------|------------------------------------------|--------------------------------------------------------------------------------------|-------------------------------------------------------------------------------------------------------------------------------------------------------------------------------------------------------------------------------------------------------------------------------|---------------------------|
|    |            |                                          |                                                                                      | In the LDT, it inhibited 100% the larval development at all concentrations<br>EC <sub>50</sub> 0.89 µg/mL for L3 migration inhibition test (LMT)                                                                                                                              |                           |
| 87 | Cubebin    | <i>Piper cubeba</i> F.<br>Piperaceae     | 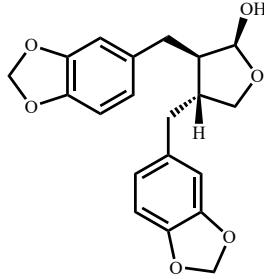   | Activity against <i>Trypanosoma cruzi</i>                                                                                                                                                                                                                                     | (Esperandim et al., 2013) |
|    |            |                                          |                                                                                      | In vitro anthelmintic activity against gastrointestinal nematodes in sheep<br>EC <sub>50</sub> 150.00 µg/mL for ovicidal activity<br>EC <sub>50</sub> of 14.89 µg/ mL for larval development test (LDT)<br>EC <sub>50</sub> 0.34 µg/mL for L3 migration inhibition test (LMT) | (Carlis et al., 2019)     |
| 88 | Isocubebin | <i>Daphne feddei</i> F.<br>Thymelaeaceae |  | Activity against HIV-1<br>EC <sub>50</sub> 8.27 µg/ mL CC <sub>50</sub> 173.4 µg/mL TI 21.0                                                                                                                                                                                   | (Hu et al., 2011)         |

|    |                  |                                                      |                                                                                      |                                                                                                                           |                        |
|----|------------------|------------------------------------------------------|--------------------------------------------------------------------------------------|---------------------------------------------------------------------------------------------------------------------------|------------------------|
| 89 | Savinin          | <i>Chamaecyparis obtusa</i> F.<br>Cupressaceae       | 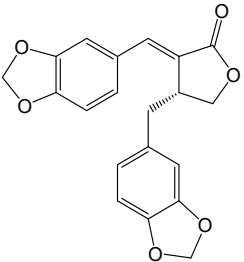   | Active against SARS-CoV replication<br>EC <sub>50</sub> 1.13 μM                                                           | (Xu et al., 2022)      |
| 90 | Sanguinolignan A | <i>Piper sanguineispicum</i> F.<br>Piperaceae        |    | Active against axenic amastigote forms of <i>Leishmania amazonensis</i><br>IC <sub>50</sub> 36.7±3.08 μg cm <sup>-3</sup> | (Teponno et al., 2016) |
| 91 | Trachelogenin    | <i>Trachelospermum jasminoides</i> F.<br>Apocynaceae |   | Anti-HCV<br>EC <sub>50</sub> 0.87 μM and 0.69 μM for HCVcc model and HCVpp model, respectively                            | (Xu et al., 2022)      |
| 92 | Arctigenin (ATG) | <i>Arctium lappa</i> F.<br>Asteraceae                |  | It induces the production of interferon and inhibits the expression of protein P17 and P24 of the HIV-1 virus             | (Cui et al., 2020)     |

|    |                                          |                                                |                                                                                      |                                                                                                                                                                                |                    |
|----|------------------------------------------|------------------------------------------------|--------------------------------------------------------------------------------------|--------------------------------------------------------------------------------------------------------------------------------------------------------------------------------|--------------------|
| 93 | Yatein                                   | <i>Chamaecyparis obtusa</i> F.<br>Cupressaceae | 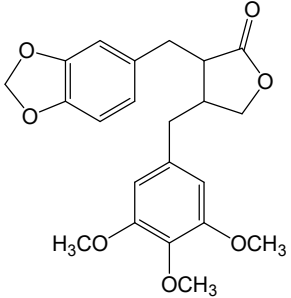   | It inhibits HSV-1 alpha gene expression, including expression of the ICP0 and ICP4 genes, and by arresting HSV-1 DNA synthesis and structural protein expression in HeLa cells | (Cui et al., 2020) |
| 94 | Syringaresinol 4''-O-β-D-glucopyranoside | <i>Swertia chirayita</i> F.<br>Gentianaceae    |    | Active against HBV                                                                                                                                                             | (Liu et al., 2020) |
| 95 | Daphnenin                                | <i>Daphne acutiloba</i> F.<br>Thymelaeaceae    |   | Active against HIV EC <sub>50</sub> 0.64 μM                                                                                                                                    | (Xu et al., 2022)  |
| 96 | Lariciresinol-4-O-β-D-glucopyranoside    | <i>Isatis indigotica</i> F.<br>Cruciferae      |  | It inhibits the IAV-induced pro-inflammatory response                                                                                                                          | (Cui et al., 2020) |



|    |                                                                                |                                            |                                                                                     |                                                                                                                                                                                                         |                                                                                                                |
|----|--------------------------------------------------------------------------------|--------------------------------------------|-------------------------------------------------------------------------------------|---------------------------------------------------------------------------------------------------------------------------------------------------------------------------------------------------------|----------------------------------------------------------------------------------------------------------------|
| 97 | Clemastanin B<br>(7S,8R,8'R-(-)-lariciresinol-4,4' -bis-O-β-D-glucopyranoside) | <i>Isatis indigotica</i> F.<br>Cruciferae  | 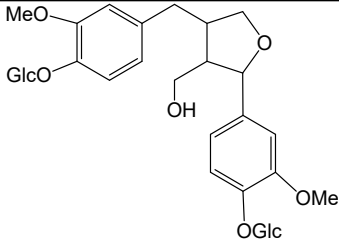  | Active against subtypes of human IAVs (H1N1, H3N2, and influenza B)                                                                                                                                     | (Cui et al., 2020)                                                                                             |
| 98 | Phillygenin                                                                    | <i>Forsythia suspensa</i><br>F. Oleaceae   |   | Good protector against influenza A virus (IAV)                                                                                                                                                          | (Cui et al., 2020)                                                                                             |
| 99 | Sesamin                                                                        | <i>Sesamum indicum</i><br>F. Pedaliaceae   |  | It inhibits influenza type A H1N1 infection <i>via</i> reduced IL-1β and TNF-α levels leading to inhibition of the cytokine storm and increased IL-2 levels leading to a stimulation of immune response | (Fanhchaksai et al., 2016);<br>(Cui et al., 2020)                                                              |
|    |                                                                                | <i>Artemisia gorgonum</i><br>F. Asteraceae |                                                                                     |                                                                                                                                                                                                         | Active against chloroquine-resistant <i>Plasmodium falciparum</i> (FcB1 strain)<br>IC <sub>50</sub> 3.37 μg/ml |

|     |               |                                                      |                                                                                      |                                                                                                                                                       |                   |
|-----|---------------|------------------------------------------------------|--------------------------------------------------------------------------------------|-------------------------------------------------------------------------------------------------------------------------------------------------------|-------------------|
| 100 | Herpetetrone  | <i>Herpetospermum caudigerum</i> F.<br>Cucurbitaceae | 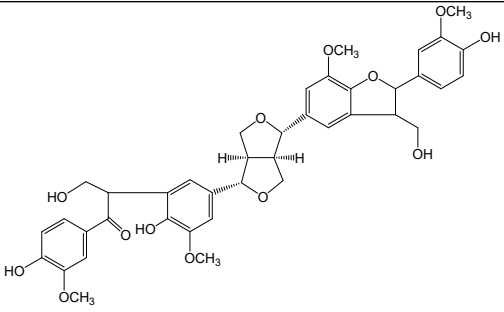   | Inhibitory effects on HBsAg secretion with IC <sub>50</sub> values of 4.89 μmol/L, and on HBeAg secretion with IC <sub>50</sub> values of 8.02 μmol/L | (Wu, 2016)        |
| 101 | Manassantin A | <i>Saururus chinensis</i> F.<br>Saururaceae          |    | HIV-1-induced cytopathic effects with EC <sub>100</sub> 1.0 μM. It inhibits EBV lytic DNA replication in P3HR-1 cells with EC <sub>50</sub> 3.42 μM   | (Xu et al., 2022) |
| 102 | Manassantin B | <i>Saururus chinensis</i> F.<br>Saururaceae          |    | HIV-1-induced cytopathic effects with EC <sub>100</sub> 1.0 μM. It inhibits EBV lytic DNA replication in P3HR-1 cells with EC <sub>50</sub> 1.72 μM   | (Xu et al., 2022) |
| 103 | Saucerneol D  | <i>Saururus chinensis</i> F.<br>Saururaceae          |   | It inhibits EBV lytic DNA replication in P3HR-1 cells with EC <sub>50</sub> 1.09 μM                                                                   | (Xu et al., 2022) |
| 104 | Vladinol F    | <i>Daphne feddei</i> F.<br>Thymelaeaceae             |  | Anti-HIV-1 activity with EC <sub>50</sub> 3.28 μg/mL, CC <sub>50</sub> 102.5 μg/mL and TI 31.3                                                        | (Hu et al., 2011) |
|     |               | <i>Schisandra micrantha</i> F.<br>Schisandraceae     |                                                                                      | Anti-HIV-1 activity with an EC <sub>50</sub> value of 9.75 μM and TI value of 27.45                                                                   | (Xu et al., 2022) |

|     |                  |                                                        |                                                                                                                                    |                                                                                                           |                         |
|-----|------------------|--------------------------------------------------------|------------------------------------------------------------------------------------------------------------------------------------|-----------------------------------------------------------------------------------------------------------|-------------------------|
|     |                  | <i>Drybalanops oblongifolia</i> F.<br>Dipterocarpaceae |                                                                                                                                    | Active against <i>Plasmodium falciparum</i> 3D7<br>IC <sub>50</sub> 3.51 µg/mL.                           | (Indriani et al., 2021) |
| 105 | Balaphonin       | <i>Schisandra lancifolia</i> F.<br>Schisandraceae      | 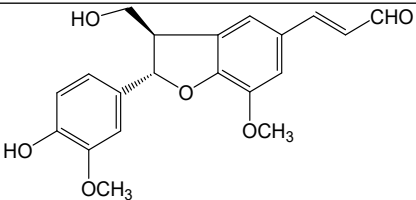                                                 | Anti-HIV-1 effects with an EC <sub>50</sub> value of 8.43 µM and TI value of 4.3                          | (Xu et al., 2022)       |
| 106 | Ococymosin       | <i>Ocotea cymosa</i> F.<br>Lauraceae                   |                                                  | Antiparasitic activity against the Dd2 strain of <i>Plasmodium falciparum</i><br>IC <sub>50</sub> 0.45 µM | (Teponno et al., 2016)  |
| 107 | Tiegusanin G     | <i>Schisandra propinqua</i> F.<br>Schisandraceae       | <br>R <sub>1</sub> = Ang, R <sub>2</sub> = t-Cin | Anti-HIV-1 activity with an EC <sub>50</sub> value of 8 µM and TI of more than 25                         | (Teponno et al., 2016)  |
| 108 | Neglectalignan A | <i>Schisandra neglecta</i> F.<br>Schisandraceae        |                                                | It showed moderate anti-HIV-1 activities with TI value above 62                                           | (Teponno et al., 2016)  |

|     |                                  |                                                   |                                                                                     |                                                                                                                                                                                                          |                                  |
|-----|----------------------------------|---------------------------------------------------|-------------------------------------------------------------------------------------|----------------------------------------------------------------------------------------------------------------------------------------------------------------------------------------------------------|----------------------------------|
| 109 | Neglectalignan B                 | <i>Schisandra neglecta</i><br>F. Schisandraceae   | 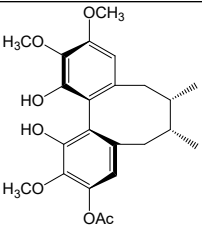  | It showed moderate anti-HIV-1 activity with TI value above 23                                                                                                                                            | (Teponno et al., 2016)           |
| 110 | Deoxyschizandrin (Schisandrin A) | <i>Schisandra Chinensis</i> F.<br>Schisandraceae  |   | It can inhibit the replication of DENV in a concentration- and time-dependent manner, with 50% (EC <sub>50</sub> ) value of 28.1 ± 0.42 μM against DENV serotype type 2 without significant cytotoxicity | (Yu et al., 2017)                |
|     |                                  | <i>Schisandra wilsoniana</i> F.<br>Schisandraceae |                                                                                     | Anti-HBV effects. It inhibited the RT-associated RDDP activity in the micromolar range IC <sub>50</sub> ~30 μM                                                                                           | (Wu, 2016);<br>(Xu et al., 2015) |
| 111 | Schisandrin B                    | <i>Schisandra Chinensis</i> F.<br>Schisandraceae  |  | It inhibited the HIV-1 RT-associated DNA polymerase activity. It inhibited the RT-associated RDDP activity in the micromolar range (IC <sub>50</sub> ~30 μM                                              | (Xu et al., 2015)                |

|     |                    |                                                   |                                                                                     |                                                                                                                                                                    |                                                   |
|-----|--------------------|---------------------------------------------------|-------------------------------------------------------------------------------------|--------------------------------------------------------------------------------------------------------------------------------------------------------------------|---------------------------------------------------|
| 112 | Schinlignan G      | <i>Schisandra chinensis</i> F.<br>Schisandraceae  | 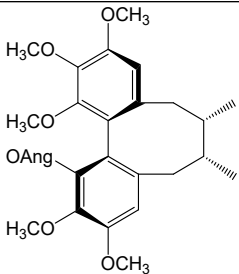  | Active against HBV DNA replication IC <sub>50</sub> 5 μg/mL                                                                                                        | (Teponno et al., 2016)                            |
| 113 | Rubrifloralignan A | <i>Schisandra rubriflora</i> F.<br>Schisandraceae |   | Active against HIV EC <sub>50</sub> 11.3 μM<br>TI 5.7                                                                                                              | (Chen et al., 2006); (Cui et al., 2020)           |
| 114 | Schisanhenol       | <i>Schisandra rubriflora</i> F.<br>Schisandraceae |   | Active against HIV EC <sub>50</sub> 5.7 μM<br>TI 7.4                                                                                                               | (Chen et al., 2006)                               |
| 115 | Magnolol           | <i>Magnolia officinalis</i> F.<br>Magnoliaceae    |  | Inhibitor of Epstein-Barr virus early antigen (EBV-EA)                                                                                                             | (Perez G., 2003); (Jansi et al., 2021)            |
|     |                    | <i>Streblus asper</i> F.<br>Moraceae              |                                                                                     | Active against HBV IC <sub>50</sub> 2.03 and 3.76 μM, for HBsAg and HBeAg with no cytotoxicity. It inhibits the replication of HBV DNA<br>IC <sub>50</sub> 8.67 μM | (Li et al., 2012); (Wu, 2016); (Liu et al., 2020) |
|     |                    | <i>Magnolia grandiflora</i> F.                    |                                                                                     | Antiplasmodial activity<br>IC <sub>50</sub> 3.4 ± 0.08 μM                                                                                                          | (Latif et al., 2017)                              |

|     |             |                                                |                                                                                     |                                                                                                                             |                                        |
|-----|-------------|------------------------------------------------|-------------------------------------------------------------------------------------|-----------------------------------------------------------------------------------------------------------------------------|----------------------------------------|
|     |             | Magnoliaceae                                   |                                                                                     |                                                                                                                             |                                        |
| 116 | Honokiol    | <i>Magnolia officinalis</i><br>F. Magnoliaceae | 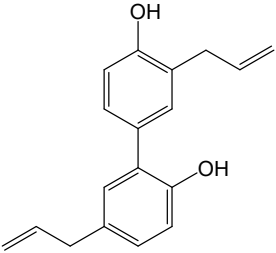  | Inhibitor of Epstein-Barr virus early antigen (EBV-EA)                                                                      | (Perez G., 2003); (Jansi et al., 2021) |
|     |             | <i>Streblus asper</i> F.<br>Moraceae           |                                                                                     | Active against HBV IC <sub>50</sub> 3.14 μmol/L (SI = 21.47) and 4.74 μmol/L (SI = 14.22) for HBsAg and HbeAg, respectively | (Wu, 2016); (Liu et al., 2020)         |
|     |             | <i>Magnolia grandiflora</i> F.<br>Magnoliaceae |                                                                                     | Activity against <i>Plasmodium falciparum</i> IC <sub>50</sub> 16.5 ± 0.2 μM                                                | (Latif et al., 2017)                   |
| 117 | Peperomin A | <i>Peperomia pellucida</i><br>F. Piperaceae    |   | It has inhibitory effects on HIV-1 IIIB growth in C8166 cells<br>EC <sub>50</sub> ~5 μM                                     | (Cui et al., 2020)                     |
| 118 | Peperomin B | <i>Peperomia pellucida</i><br>F. Piperaceae    |  | It has inhibitory effect on HIV-1 IIIB growth in C8166 cells,<br>EC <sub>50</sub> ~5 μM                                     | (Cui et al., 2020)                     |

|     |                                                      |                                          |                                                                                      |                                                                                                                                                                                                                                                    |                                             |
|-----|------------------------------------------------------|------------------------------------------|--------------------------------------------------------------------------------------|----------------------------------------------------------------------------------------------------------------------------------------------------------------------------------------------------------------------------------------------------|---------------------------------------------|
| 119 | (7'R,8'S,7''R,8''S)-<br>erythro-<br>Strebluslignan G | <i>Streblus asper</i> F.<br>Moraceae     | 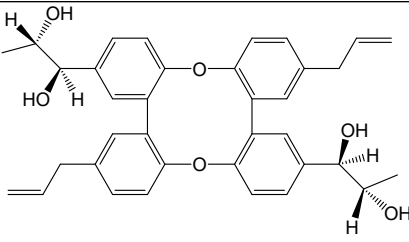   | It exhibited significant anti-HBV activity in the secretion of HBsAg and HBeAg<br>IC <sub>50</sub> 1.58 and 3.24 μM, respectively. Also, it showed significant anti-HBV activity to inhibit the replication of HBV DNA<br>IC <sub>50</sub> 9.02 μM | (Li et al., 2012); (Cui et al., 2020)       |
| 120 | Silybin A                                            | <i>Silybum marianum</i><br>F. Asteraceae |    | Anti-HCV and other viruses; it inhibited the replication of IAV and other viruses, such as DENV, Chikungunya virus, Mayaro virus, HIV, and HBV                                                                                                     | (Cui et al., 2020); (Antika and Dewi, 2021) |
| 121 | Silybin B                                            | <i>Silybum marianum</i><br>F. Asteraceae |   | Antiviral activity against HCV, HBV, DENV, enterovirus family, Mayaro virus, and chikungunya virus                                                                                                                                                 | (Antika and Dewi, 2021)                     |
| 122 | Silydianin                                           | <i>Silybum marianum</i><br>F. Asteraceae |  | Antiviral activity against HCV, HBV, DENV, enterovirus family, Mayaro virus, and chikungunya virus                                                                                                                                                 | (Antika and Dewi, 2021)                     |

|     |              |                                          |                                                                                    |                                                                                                    |                         |
|-----|--------------|------------------------------------------|------------------------------------------------------------------------------------|----------------------------------------------------------------------------------------------------|-------------------------|
| 123 | Silychristin | <i>Silybum marianum</i><br>F. Asteraceae | 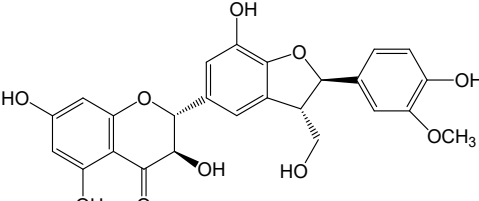 | Antiviral activity against HCV, HBV, DENV, enterovirus family, Mayaro virus, and chikungunya virus | (Antika and Dewi, 2021) |
|-----|--------------|------------------------------------------|------------------------------------------------------------------------------------|----------------------------------------------------------------------------------------------------|-------------------------|



**Table S2: A list of plant-derived phenylethanoids and phenylpropanoids with other biological activities**

| No. | Compound                   | Source                                          | Structure                                                                            | Biological activity                                               | Ref.                   |
|-----|----------------------------|-------------------------------------------------|--------------------------------------------------------------------------------------|-------------------------------------------------------------------|------------------------|
| 1   | 3,4-Dihydroxybenzalacetone | <i>Phellinus linteus</i> F.<br>Hymenochaetaceae | 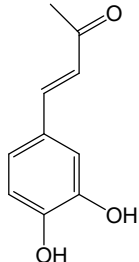  | Anti-inflammatory,<br>antitumor                                   | (Chen et al.,<br>2019) |
| 2   | Hispidin                   | <i>Phellinus linteus</i> F.<br>Hymenochaetaceae |   | Antioxidative,<br>antitumor,<br>antidiabetic,<br>cardioprotective | (Chen et al.,<br>2019) |
| 3   | Phellinstatin              | <i>Phellinus linteus</i> F.<br>Hymenochaetaceae |   | Antimicrobial                                                     | (Chen et al.,<br>2019) |
|     |                            |                                                 |  |                                                                   |                        |
| 4   | Meshimakobnol A            | <i>Phellinus linteus</i> F.<br>Hymenochaetaceae | R = OH                                                                               | Antitumor                                                         | (Chen et al.,<br>2019) |

|   |                      |                                                 |                                                                                      |              |                        |
|---|----------------------|-------------------------------------------------|--------------------------------------------------------------------------------------|--------------|------------------------|
| 5 | Meshimakobnol B      | <i>Phellinus linteus</i> F.<br>Hymenochaetaceae | R = H                                                                                | Antitumor    | (Chen et al.,<br>2019) |
| 6 | Phellifuropyranone A | <i>Phellinus linteus</i> F.<br>Hymenochaetaceae | 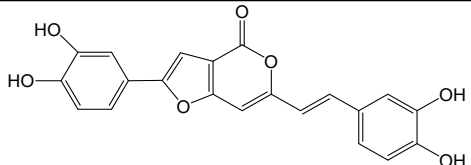   | Antitumor    | (Chen et al.,<br>2019) |
| 7 | Phelligridimer A     | <i>Phellinus linteus</i> F.<br>Hymenochaetaceae |    | Antidiabetic | (Chen et al.,<br>2019) |
| 8 | Hypholomine B        | <i>Phellinus linteus</i> F.<br>Hymenochaetaceae |   | Antidiabetic | (Chen et al.,<br>2019) |
| 9 | Interfungin A        | <i>Phellinus linteus</i> F.<br>Hymenochaetaceae |  | Antidiabetic | (Chen et al.,<br>2019) |

|    |                                      |                                                                             |                                                                                       |                                                                                         |                                                  |
|----|--------------------------------------|-----------------------------------------------------------------------------|---------------------------------------------------------------------------------------|-----------------------------------------------------------------------------------------|--------------------------------------------------|
| 10 | Davallialactone                      | <i>Phellinus linteus</i> F.<br>Hymenochaetaceae                             | 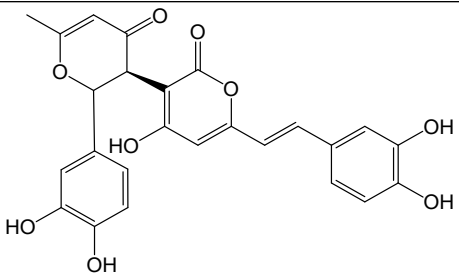    | Antidiabetic                                                                            | (Chen et al., 2019)                              |
| 11 | Inoscavin A                          | <i>Phellinus linteus</i> F.<br>Hymenochaetaceae                             |     | Antidiabetic                                                                            | (Chen et al., 2019)                              |
| 12 | Cinnamyl alcohol                     | <i>Rhodiola rosea</i> & <i>R. arctica</i> F. Crassulaceae                   |    | Weak tonic                                                                              | (Kurkin, 2003)                                   |
|    |                                      |                                                                             |                                                                                       | suppresses 3T3-L1 cell differentiation by inhibiting anti-adipogenesis-related proteins | (Hwang et al., 2017)                             |
| 13 | Cinnamaldehyde (3-phenyl-2-propenal) | <i>Cinnamomum cassia</i> & <i>C. zeylanicum</i> F.<br>Lauraceae             |   | Anti-inflammatory                                                                       | (Ilijeva and Buchbauer, 2016); (Sá et al., 2014) |
| 14 | 2'-hydroxycinnamaldehyde             | <i>Cinnamomum cassia</i> F.<br>Lauraceae                                    |  | Anti-inflammatory                                                                       | (Sá et al., 2014)                                |
| 15 | Cinnamyl acetate                     | <i>Cinnamomum zeylanicum</i> & other <i>Cinnamomum</i> spp. F.<br>Lauraceae |  | Anti-inflammatory                                                                       | (Sá et al., 2014)                                |

|                                                                                    |                                               |                                                                                                                                                                                                                                                                                                                                                                  |                                                                                       |                                                                                      |                                                  |
|------------------------------------------------------------------------------------|-----------------------------------------------|------------------------------------------------------------------------------------------------------------------------------------------------------------------------------------------------------------------------------------------------------------------------------------------------------------------------------------------------------------------|---------------------------------------------------------------------------------------|--------------------------------------------------------------------------------------|--------------------------------------------------|
| 16                                                                                 | Cinnamic acid<br>(3-phenylprop-2-enoic acid)  | <i>Cinnamomum zeylanicum</i> F.<br>Lauraceae, <i>Coffea arabica</i> F. Rubiaceae<br><i>Thea sinensis</i> F.<br>Theaceae<br><i>Theobroma cocoa</i> F.<br>Malvaceae<br><i>Ilexpara guariensis</i> F.<br>Aquifoliaceae<br><i>Spinacia oleracea</i> F.<br>Amaranthaceae<br><i>Solanum tuberosum</i> F.<br>Solanaceae<br><i>Solanum lycopersicum</i> F.<br>Solanaceae | 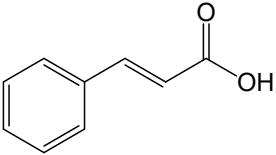   | Antibacterial, antitubercular, antifungal, anticancer and anti-inflammatory activity | (Sá et al., 2014)                                |
|  |                                               |                                                                                                                                                                                                                                                                                                                                                                  |                                                                                       |                                                                                      |                                                  |
| 17                                                                                 | <i>p</i> -Hydroxycinnamic acid                | <i>Vepris glomerata</i> F.<br>Rutaceae                                                                                                                                                                                                                                                                                                                           | $R_1 = R_2 = R_3 = R_4 = H$ ; $R_2 = OH$                                              | Antibacterial agent                                                                  | (Kiplimo and Koorbanally, 2012)                  |
| 18                                                                                 | Methyl cinnamate                              | <i>Vepris glomerata</i> F.<br>Rutaceae                                                                                                                                                                                                                                                                                                                           | $R_1 = R_2 = OH$ ; $R_3 = H$ ; $R_4 = CH_3$                                           | Antibacterial agent                                                                  | (Kiplimo and Koorbanally, 2012)                  |
| 19                                                                                 | Elemicin<br>(5-allyl-1,2,3-trimethoxybenzene) | <i>Myristica fragrans</i> F.<br>Myristicaceae &<br><i>Asiasarum sieboldii</i> F.<br>Aristolochiaceae                                                                                                                                                                                                                                                             |  | Anti-inflammatory                                                                    | (Ilijeva and Buchbauer, 2016); (Sá et al., 2014) |

|    |                                                              |                                                                                                                                                                                                                                                                                                                                                                                  |                                                                                      |                                                                                                                                                                          |                                     |
|----|--------------------------------------------------------------|----------------------------------------------------------------------------------------------------------------------------------------------------------------------------------------------------------------------------------------------------------------------------------------------------------------------------------------------------------------------------------|--------------------------------------------------------------------------------------|--------------------------------------------------------------------------------------------------------------------------------------------------------------------------|-------------------------------------|
| 20 | Estragole<br>(1-allyl-4-methoxy-<br>benzene)                 | <i>Artemisia dracunculus</i><br>F. Asteraceae<br><i>Leonotis ocyimifolia</i> F.<br>Lamiaceae, <i>Ocimum<br/>basilicum</i> F. Lamiaceae,<br><i>Croton zehntneri</i> F.<br>Euphorbiaceae,<br><i>Pimpinella anisum</i> F.<br>Apiaceae<br><i>Foeniculum vulgare</i> F.<br>Apiaceae;<br><i>Illicium anisatum</i> F.<br>Schisandraceae,<br><i>Boswellia serrata</i> F.<br>Asparagaceae | 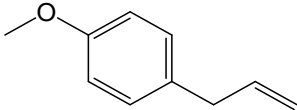  | Anti-inflammatory<br>and anti-platelet<br>activity. It is<br>involved in<br>immunological<br>processes,<br>including the<br>inhibition of all<br>effects on TNF $\alpha$ | (Ilijeva and<br>Buchbauer,<br>2016) |
| 21 | Asarone<br>(1,2,4-trimethoxy-5-[(E)-<br>prop-1-enyl]benzene) | <i>Daucus carota</i> F.<br>Apiaceae                                                                                                                                                                                                                                                                                                                                              |   | Anti-inflammatory                                                                                                                                                        | (Sá et al., 2014)                   |
| 22 | Phenethyl alcohol                                            | <i>Oils obtained from the<br/>blossoms of Rose spp.</i><br>F. Rosaceae<br><i>Citrus aurantium</i> subsp.<br><i>amara</i> F. Rutaceae<br><i>Cananga odorata</i> F.<br>Annonaceae, <i>Dianthus<br/>caryophyllus</i> F.<br>Caryophyllaceae and<br><i>Pelargonium</i> spp. F.<br>Geraniaceae                                                                                         |  | Anti-inflammatory                                                                                                                                                        | (Sá et al., 2014)                   |

|    |                                                           |                                                                                                                                |                                                                                       |                                                                                                                                                                                                                                            |                                                  |
|----|-----------------------------------------------------------|--------------------------------------------------------------------------------------------------------------------------------|---------------------------------------------------------------------------------------|--------------------------------------------------------------------------------------------------------------------------------------------------------------------------------------------------------------------------------------------|--------------------------------------------------|
| 23 | Hydroxychavicol<br>(4-prop-2-enylbenzene-1,2-diol)        | <i>Piper betle</i> F.<br>Piperaceae                                                                                            | 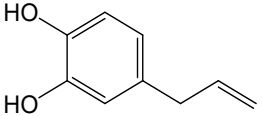   | Antimicrobial, antioxidant, anti-inflammatory, cytotoxic and antiplatelet activities                                                                                                                                                       | (Ilijeva and Buchbauer, 2016)                    |
| 24 | 2'-Hydroxycinnamaldehyde [3-(2-hydroxyphenyl)-2-propenal] | <i>Cinnamomum cassia</i> F.<br>Lauraceae                                                                                       |    | Immune-modulatory and anti-inflammatory activity                                                                                                                                                                                           | (Ilijeva and Buchbauer, 2016); (Sá et al., 2014) |
| 25 | Isoeugenol (4-propenyl-2-methoxyphenol)                   | <i>Eugenia caryophyllata</i> F.<br>Myrtaceae                                                                                   |    | Inhibitory effect against some metabolic enzymes such as $\alpha$ -amylase, $\alpha$ -glycosidase and acetylcholinesterase enzymes<br>IC <sub>50</sub> 411.5, 19.25 and 77.00 nM, respectively<br>Ki 21 ± 9 nM and 16 ± 3 nM, respectively | (Topal, 2019)                                    |
| 26 | Methyleugenol (4-allyl-1,2-dimethoxybenzene)              | <i>Cinnamomum cordatum</i> F. Lauraceae & <i>Croton malambo</i> F. Euphorbiaceae                                               |  | Antibacterial, antifungal, anticancer, anti-inflammatory and antiplatelet activities                                                                                                                                                       | (Ilijeva and Buchbauer, 2016); (Sá et al., 2014) |
| 27 | Methylisoeugenol (1,2-dimethoxy-4-propenylbenzene)        | <i>Asarum arifolium</i> F. Aristolochiaceae,<br><i>Cymbopogon javanensis</i> F. Poaceae & <i>Pimenta pseudocaryophyllus</i> F. |  | Hypotensive, vasorelaxant, anxiolytic and antidepressant activities                                                                                                                                                                        | (Ilijeva and Buchbauer, 2016)                    |

|    |                                                             |                                                                                                                                                                                                               |                                                                                       |                                                                                                                                                                                                           |                                                  |
|----|-------------------------------------------------------------|---------------------------------------------------------------------------------------------------------------------------------------------------------------------------------------------------------------|---------------------------------------------------------------------------------------|-----------------------------------------------------------------------------------------------------------------------------------------------------------------------------------------------------------|--------------------------------------------------|
|    |                                                             | Myrtaceae                                                                                                                                                                                                     |                                                                                       |                                                                                                                                                                                                           |                                                  |
| 28 | Myristicin<br>(1-allyl-3,4-methylenedioxy-5-methoxybenzene) | <i>Petroselinum crispum</i> F. Apiaceae<br><i>Daucus crota</i> F. Apiaceae<br><i>Ocimum basilicum</i> F. Lamiaceae<br><i>Cinnamomum zeylanicum</i> F. Lauraceae<br><i>Myristica fragrans</i> F. Myristicaceae | 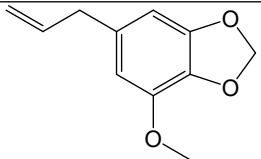   | Used in traditional medicine for the treatment of anxiety, diarrhea and stomach aches<br>Besides its carminative effect it has antibacterial, anti-inflammatory, anticancer and hepatoprotective activity | (Ilijeva and Buchbauer, 2016); (Sá et al., 2014) |
| 29 | Safrole<br>(4-allyl-1,2-methylenedioxybenzen)               | <i>Sassafras albidum</i> F. Lauraceae<br><i>Ocimum basilicum</i> F. Lamiaceae<br><i>Pimpinella anisum</i> F. Apiaceae<br><i>Myristica fragrans</i> F. Myristicaceae<br>and <i>Piper nigrum</i> F. Piperaceae  |    | It is a well-known mutagenic and carcinogenic agent. It has anticancer, anti-inflammatory and analgesic effects                                                                                           | (Ilijeva and Buchbauer, 2016); (Sá et al., 2014) |
| 30 | <i>p</i> -Coumaryl alcohol                                  | <i>Rhodiola rosea</i> F. Crassulaceae                                                                                                                                                                         |  | Tonic                                                                                                                                                                                                     | (Kurkin, 2003)                                   |
| 31 | Rosin                                                       | <i>Rhodiola rosea</i> & <i>R. arctica</i> F. Crassulaceae                                                                                                                                                     |   | Tonic                                                                                                                                                                                                     | (Kurkin, 2003)                                   |
| 32 | Rosavin                                                     | <i>Rhodiola rosea</i> ; <i>R. arctica</i> F. Crassulaceae                                                                                                                                                     |   | Immunomodulating activity                                                                                                                                                                                 | (Zapesochnaya et al., 1995)                      |

|    |                                     |                                                                                                                 |  |                           |                                 |
|----|-------------------------------------|-----------------------------------------------------------------------------------------------------------------|--|---------------------------|---------------------------------|
| 33 | Rosarin                             | <i>Rhodiola rosea</i> ; <i>R. arctica</i> F. Crassulaceae                                                       |  | Tonic                     | (Kurkin, 2003)                  |
| 34 | Triandrin                           | <i>Rhodiola rosea</i> F. Crassulaceae; <i>Salix triandra</i> F. Salicaceae; <i>Lilium cordatum</i> F. Liliaceae |  | Immunomodulating activity | (Zapesochnaya et al., 1995)     |
| 35 | Glomerol                            | <i>Vepris glomerata</i> F. Rutaceae                                                                             |  | Antibacterial agent       | (Kiplimo and Koorbanally, 2012) |
| 36 | 1,3-Dicaffeoylquinic acid (cynarin) | <i>Helichrysum italicum</i> F. Asteraceae                                                                       |  | Cholagogue                | (Kurkin, 2003)                  |
| 37 | Forsythoside C                      | <i>Forsythia suspensa</i> F. Oleaceae                                                                           |  | Antimicrobial             | (Kurkin, 2003)                  |
| 38 | Plantamajoside                      | <i>Plantago major</i> F. Plantaginaceae                                                                         |  | Antimicrobial             | (Kurkin, 2003)                  |



|                                                                                    |                                                                                                                  |                                                  |                                                                                                                                                                |                                                                                                             |                       |
|------------------------------------------------------------------------------------|------------------------------------------------------------------------------------------------------------------|--------------------------------------------------|----------------------------------------------------------------------------------------------------------------------------------------------------------------|-------------------------------------------------------------------------------------------------------------|-----------------------|
| 39                                                                                 | Americanol A                                                                                                     | <i>Phytolacca americana</i><br>F. Phytolaccaceae | 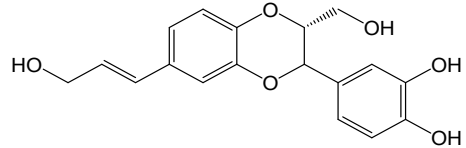                                                                             | Hepatoprotector<br>and neutropic<br>activity                                                                | (Kurkin, 2003)        |
|  |                                                                                                                  |                                                  |                                                                                                                                                                |                                                                                                             |                       |
| 40                                                                                 | Jinoside A                                                                                                       | <i>Rehmannia glutinosa</i> F.<br>Orobanchaceae   | R <sub>1</sub> = β-galactosyl; R <sub>2</sub> = feruloyl; R <sub>3</sub> = α-rhamnosyl; R <sub>4</sub> = R <sub>5</sub> = R <sub>6</sub> = H                   | immunosuppressive<br>action                                                                                 | (Pan et al.,<br>2003) |
| 41                                                                                 | Jinoside B                                                                                                       | <i>Rehmannia glutinosa</i> F.<br>Orobanchaceae   | R <sub>1</sub> = β-galactosyl; R <sub>2</sub> = feruloyl; R <sub>3</sub> = α-rhamnosyl; R <sub>4</sub> = CH <sub>3</sub> ; R <sub>5</sub> = R <sub>6</sub> = H | immunosuppressive<br>action                                                                                 | (Pan et al.,<br>2003) |
| 42                                                                                 | 3,4-Dihydroxy-β-phenethyl-O-β-D-glucopyranosyl-(1→3)-O-α-L-rhamopyranosyl-(1→6)-4-O-caffeoyl-β-D-glucopyranoside | <i>Rehmannia glutinosa</i> F.<br>Orobanchaceae   | R <sub>1</sub> = H; R <sub>2</sub> = caffeoyl; R <sub>3</sub> = β-glucosyl; R <sub>4</sub> = R <sub>5</sub> = R <sub>6</sub> = H                               | Active against<br><i>Pseudomonas capacia</i> and <i>P. maltophilia</i>                                      | (Pan et al.,<br>2003) |
| 43                                                                                 | 3,4-Dihydroxy-β-phenethyl-O-β-D-glucopyranosyl-(1→3)-4-O-caffeoyl-β-D-glucopyranoside                            | <i>Rehmannia glutinosa</i> F.<br>Orobanchaceae   | R <sub>1</sub> = α-rhamnosyl; R <sub>2</sub> = caffeoyl; R <sub>3</sub> = β-glucosyl; R <sub>4</sub> = R <sub>5</sub> = R <sub>6</sub> = H                     | Active against<br><i>Pseudomonas capacia</i> and <i>P. maltophilia</i> at concentrations of 0.2–0.5 mg/disk | (Pan et al.,<br>2003) |
| 44                                                                                 | Incanoside                                                                                                       | <i>Caryopteris incana</i> F.<br>Lamiaceae        | R <sub>1</sub> = caffeoyl; R <sub>2</sub> = H; R <sub>3</sub> = β-glucosyl(1→2)α-rhamnosyl; R <sub>4</sub> = R <sub>5</sub> = R <sub>6</sub> = H               | Antioxidant and antimicrobial activity against Gram +ve and -ve bacteria                                    | (Pan et al.,<br>2003) |
| 45                                                                                 | Incanoside C                                                                                                     | <i>Caryopteris incana</i> F.                     | R <sub>1</sub> = H; R <sub>2</sub> = feruloyl; R <sub>3</sub> = β-                                                                                             | Antioxidant                                                                                                 | (Pan et al.,          |

|    |                   |                                                       |                                                                                                                                                                                       |                                                                                                                                |                             |
|----|-------------------|-------------------------------------------------------|---------------------------------------------------------------------------------------------------------------------------------------------------------------------------------------|--------------------------------------------------------------------------------------------------------------------------------|-----------------------------|
|    |                   | Lamiaceae                                             | glucosyl(1→2) $\alpha$ -rhamnosyl; R <sub>4</sub> = R <sub>5</sub> = R <sub>6</sub> = H                                                                                               |                                                                                                                                | 2003)                       |
| 46 | Incanoside D      | <i>Caryopteris incana</i> F.<br>Lamiaceae             | R <sub>1</sub> = H; R <sub>2</sub> = feruloyl; R <sub>3</sub> = $\beta$ -glucosyl(1→2) $\alpha$ -rhamnosyl; R <sub>4</sub> = CH <sub>3</sub> ; R <sub>5</sub> = R <sub>6</sub> = H    | Antioxidant                                                                                                                    | (Pan et al., 2003)          |
| 47 | Incanoside E      | <i>Caryopteris incana</i> F.<br>Lamiaceae             | R <sub>1</sub> = H; R <sub>2</sub> = feruloyl; R <sub>3</sub> = $\beta$ -glucosyl(1→2) $\alpha$ -rhamnosyl; R <sub>4</sub> = H; R <sub>5</sub> = CH <sub>3</sub> ; R <sub>6</sub> = H | Antioxidant                                                                                                                    | (Pan et al., 2003)          |
| 48 | Arenarioside      | <i>Ballota nigra</i> F.<br>Lamiaceae                  | R <sub>1</sub> = $\beta$ -xylosyl; R <sub>2</sub> = caffeoyl; R <sub>3</sub> = $\alpha$ -rhamnosyl; R <sub>4</sub> = R <sub>5</sub> = R <sub>6</sub> = H                              | Antioxidative and free radical scavenging activities                                                                           | (Pan et al., 2003)          |
| 49 | Balloletroside    | <i>Ballota nigra</i> F.<br>Lamiaceae                  | R <sub>1</sub> = $\beta$ -apiosyl; R <sub>2</sub> = caffeoyl; R <sub>3</sub> = $\alpha$ -arabinosyl(1→2) $\alpha$ -rhamnosyl; R <sub>4</sub> = R <sub>5</sub> = R <sub>6</sub> = H    | Antioxidative and free radical scavenging activities                                                                           | (Pan et al., 2003)          |
| 50 | Campneoside I     | <i>Paulownia tomentosa</i> F.<br><i>Paulowniaceae</i> | R <sub>1</sub> = H; R <sub>2</sub> = caffeoyl; R <sub>3</sub> = $\alpha$ -rhamnosyl; R <sub>4</sub> = R <sub>5</sub> = H; R <sub>6</sub> = OCH <sub>3</sub>                           | Active against <i>Streptococcus faecium</i> MD8b, <i>S. aureus</i> (SG 511, 285 and 503) and <i>S. pyogenes</i> (A308 and A77) | (Pan et al., 2003)          |
|    |                   |                                                       |                                                                                                                                                                                       |                                                                                                                                |                             |
| 51 | Pedicularioside A | <i>Pedicularis striata</i> F.<br>Scrophulariaceae     | R <sub>1</sub> = R <sub>2</sub> = R <sub>3</sub> = H                                                                                                                                  | Antitumor, anti-hemolysis and                                                                                                  | (Pan et al., 2003); (Frezza |

|    |                   |                                                                                              |                                                                    |                                                                                                            |                                              |
|----|-------------------|----------------------------------------------------------------------------------------------|--------------------------------------------------------------------|------------------------------------------------------------------------------------------------------------|----------------------------------------------|
|    |                   |                                                                                              |                                                                    | antioxidant activities                                                                                     | et al., 2019)                                |
| 52 | Pedicularioside N | <i>Pedicularis striata</i> F.<br>Scrophulariaceae                                            | $R_1 = R_3 = \text{Me}; R_2 = \text{H}$                            | Antitumor and antioxidant activity                                                                         | (Pan et al., 2003); (Frezza et al., 2019)    |
| 53 | Pedicularioside M | <i>Pedicularis striata</i> F.<br>Scrophulariaceae                                            | $R_1 = \text{Me}; R_2 = R_3 = \text{H}$                            | Antioxidant activity                                                                                       | (Pan et al., 2003); (Frezza et al., 2019)    |
|    |                   |                                                                                              |                                                                    |                                                                                                            |                                              |
| 54 | Forsythoside B    | <i>Phlomis armeniaca</i> F.<br>Lamiaceae &<br><i>Scutellaria salviifolia</i> F.<br>Lamiaceae | $R_1 = R_2 = \text{H}; R_3 = \beta\text{-apiosyl}; R_4 = \text{H}$ | Active against several kinds of cancer cells and antioxidant activity<br>$\text{IC}_{50} 0.08 \mu\text{M}$ | (Saracoglu et al., 1995); (Pan et al., 2003) |
| 55 | Leucosceptoside A | <i>Phlomis armeniaca</i> F.<br>Lamiaceae &<br><i>Scutellaria salviifolia</i> F.<br>Lamiaceae | $R_1 = \text{H}; R_2 = \text{CH}_3; R_3 = R_4 = \text{H}$          | Active against several kinds of cancer cells and antioxidant activity<br>$\text{IC}_{50} 0.18 \mu\text{M}$ | (Saracoglu et al., 1995); (Pan et al., 2003) |
|    |                   | <i>Penstemon linarioides</i><br>F. Scrophulariaceae                                          |                                                                    | inhibitory activity against PKCR<br>$\text{IC}_{50} 19.0 \mu\text{M}$                                      | (Zhou et al., 1998)                          |
| 56 | Martynoside       | <i>Phlomis armeniaca</i> F.<br>Lamiaceae<br><i>Scutellaria salviifolia</i> F.<br>Lamiaceae   | $R_1 = R_2 = \text{CH}_3; R_3 = R_4 = \text{H}$                    | Active against several kinds of cancer cells and antioxidant activity<br>$\text{IC}_{50} 0.17 \mu\text{M}$ | (Saracoglu et al., 1995); (Pan et al., 2003) |

|    |                    |                                                                                            |                                                                                   |                                                                                         |                                              |
|----|--------------------|--------------------------------------------------------------------------------------------|-----------------------------------------------------------------------------------|-----------------------------------------------------------------------------------------|----------------------------------------------|
| 57 | Phlinoside A       | <i>Caryopteris incana</i> F.<br>Lamiaceae                                                  | $R_1 = R_2 = R_3 = H$ ; $R_4 = \beta$ -glucosyl                                   | Antioxidant                                                                             | (Pan et al., 2003)                           |
| 58 | Phlinoside B       | <i>Phlomis armeniaca</i> F.<br>Lamiaceae<br><i>Scutellaria salviifolia</i> F.<br>Lamiaceae | $R_1 = R_2 = R_3 = H$ ; $R_4 = \beta$ -xylosyl                                    | Active against several kinds of cancer cells                                            | (Saracoglu et al., 1995); (Pan et al., 2003) |
| 59 | Phlinoside C       | <i>Phlomis armeniaca</i> F.<br>Lamiaceae<br><i>Scutellaria salviifolia</i> F.<br>Lamiaceae | $R_1 = R_2 = R_3 = H$ ; $R_4 = \alpha$ -rhamnosyl                                 | Active against several kinds of cancer cells                                            | (Saracoglu et al., 1995); (Pan et al., 2003) |
| 60 | Tecurioside        | <i>Phlomis armeniaca</i> F.<br>Lamiaceae<br><i>Scutellaria salviifolia</i> F.<br>Lamiaceae | $R_1 = R_2 = R_3 = H$ ; $R_4 = \alpha$ -lyxosyl                                   | Active against several kinds of cancer cells                                            | (Saracoglu et al., 1995); (Pan et al., 2003) |
|    |                    |                                                                                            |                                                                                   |                                                                                         |                                              |
| 61 | 2'-Acetylacteoside | <i>Cistanche deserticola</i> F.<br>Orobanchaceae                                           | $R_1 = H$ ; $R_2 =$ caffeoyl; $R_3 = \alpha$ -rhamnosyl; $R_4 = Ac$ ; $R_5 = H$   | Hepatoprotective and anti-hemolysis activities<br>Antioxidant activity                  | (Pan et al., 2003)                           |
| 62 | Tubuloside B       | <i>Cistanche deserticola</i> F.<br>Orobanchaceae                                           | $R_1 =$ caffeoyl; $R_2 = H$ ; $R_3 = \alpha$ -rhamnosyl; $R_4 = Ac$ ; $R_5 = H$   | Hepatoprotective activity<br>Antioxidant activity                                       | (Pan et al., 2003)                           |
| 63 | Cistanoside C      | <i>Cistanches</i> spp. F.<br>Orobanchaceae                                                 | $R_1 = H$ ; $R_2 =$ caffeoyl; $R_3 = \alpha$ -rhamnosyl; $R_4 = H$ ; $R_5 = CH_3$ | Protective effects on both sex and learning behaviors in the hanging stress loaded mice | (Pan et al., 2003)                           |

|                                                                                    |                                                                                                |                                                        |                                                                                                                                   |                                                              |                                         |
|------------------------------------------------------------------------------------|------------------------------------------------------------------------------------------------|--------------------------------------------------------|-----------------------------------------------------------------------------------------------------------------------------------|--------------------------------------------------------------|-----------------------------------------|
| 64                                                                                 | Cistanoside D                                                                                  | <i>Pedicularis striata</i> F.<br>Scrophulariaceae      | R <sub>1</sub> = H; R <sub>2</sub> = feruloyl; R <sub>3</sub> = α-rhamnosyl; R <sub>4</sub> = H; R <sub>5</sub> = CH <sub>3</sub> | Anti-hemolysis and antioxidant activities                    | (Pan et al., 2003)                      |
| 65                                                                                 | Poliumoside                                                                                    | <i>Brandisia hancei</i> F.<br>Orobanchaceae            | R <sub>1</sub> = α-rhamnosyl; R <sub>2</sub> = caffeoyl; R <sub>3</sub> = α-rhamnosyl; R <sub>4</sub> = R <sub>5</sub> = H        | Anti-hemolysis effect                                        | (Pan et al., 2003)                      |
|                                                                                    |                                                                                                | <i>Penstemon linarioides</i> F.<br>Scrophulariaceae    |                                                                                                                                   | Inhibitory activity against PKCR<br>IC <sub>50</sub> 24.4 μM | (Zhou et al., 1998)                     |
| 66                                                                                 | Brandioside                                                                                    | <i>Brandisia hancei</i> F.<br>Orobanchaceae            | R <sub>1</sub> = α-rhamnosyl; R <sub>2</sub> = caffeoyl; R <sub>3</sub> = α-rhamnosyl; R <sub>4</sub> = R <sub>5</sub> = H        | Anti-hemolysis effect                                        | (Pan et al., 2003)                      |
| 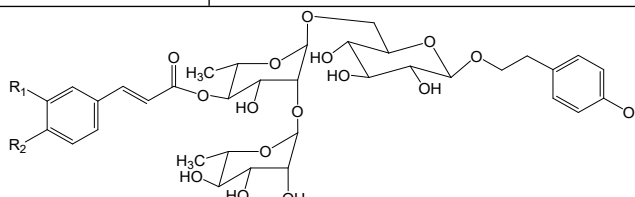 |                                                                                                |                                                        |                                                                                                                                   |                                                              |                                         |
| 67                                                                                 | 4-Cinnamoyl-mussatioside                                                                       | <i>Mussatia</i> species F.<br>Bignoniaceae             | R <sub>1</sub> = R <sub>2</sub> = H                                                                                               | Antiaggregation effect on platelets                          | (Pan et al., 2003)                      |
| 68                                                                                 | 4-Di-methylcaffeoyl-mussatioside                                                               | <i>Mussatia hyacinthina</i> F.<br>Bignoniaceae         | R <sub>1</sub> = R <sub>2</sub> = OMe                                                                                             | Antiaggregation effect on platelets                          | (Pan et al., 2003)                      |
| 69                                                                                 | 4- <i>p</i> -Methoxycinnamoyl-mussatioside                                                     | <i>Mussatia hyacinthina</i> F.<br>Bignoniaceae         | R <sub>1</sub> = H; R <sub>2</sub> = OMe                                                                                          | Antiaggregation effect on platelets                          | (Pan et al., 2003)                      |
| 70                                                                                 | 2- <i>O</i> -Acetyl-3- <i>O</i> -( <i>E</i> )- <i>p</i> -methoxycinnamoyl-α-L-rhamnopyranoside | <i>Scrophularia buergeriana</i> F.<br>Scrophulariaceae |                                              | Anti-neurodegeneration effect                                | (Kim and Kim, 2000); (Pan et al., 2003) |

|    |                                                                                                              |                                                        |                                                                                     |                                                                                   |                                          |
|----|--------------------------------------------------------------------------------------------------------------|--------------------------------------------------------|-------------------------------------------------------------------------------------|-----------------------------------------------------------------------------------|------------------------------------------|
| 71 | 2- <i>O</i> -Acetyl-3- <i>O</i> - ( <i>Z</i> )- <i>p</i> -methoxycinnamoyl- $\alpha$ -L-rhamnopyranoside     | <i>Scrophularia buergeriana</i> F.<br>Scrophulariaceae | 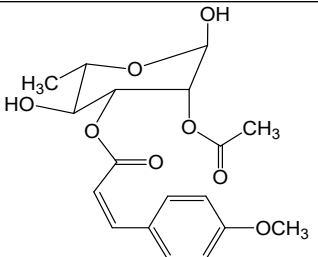 | Anti-neurodegeneration effect                                                     | (Kim and Kim, 2000); (Pan et al., 2003)  |
| 72 | 2- <i>O</i> -Acetyl-3,4-di- <i>O</i> -( <i>E</i> )- <i>p</i> -methoxycinnamoyl- $\alpha$ -L-rhamnopyranoside | <i>Scrophularia buergeriana</i> F.<br>Scrophulariaceae |   | Anti-neurodegeneration effect                                                     | (Kim and Kim, 2000); (Pan et al., 2003)  |
| 73 | 4- <i>O</i> -( <i>E</i> )- <i>p</i> -Methoxycinnamoyl- $\alpha$ -L-rhamnopyranoside                          | <i>Scrophularia buergeriana</i> F.<br>Scrophulariaceae |   | Anti-neurodegeneration effect                                                     | (Kim and Kim, 2000); (Pan et al., 2003)  |
|    |                                                                                                              |                                                        |  |                                                                                   |                                          |
| 74 | Coneferin                                                                                                    | <i>Phillyrea latifolia</i> F.<br>Oleaceae              | R = H                                                                               | Change the activity of some enzymes; antioxidant and anti-inflammatory activities | (Pan et al., 2003); (Lanza et al., 2001) |
| 75 | Syringin                                                                                                     | <i>Phillyrea latifolia</i> F.<br>Oleaceae              | R = OCH <sub>3</sub>                                                                | Change the activity of some enzymes; antioxidant and anti-inflammatory activities | (Pan et al., 2003); (Lanza et al., 2001) |

|    |                                     |                                                                                                                                                                                                       |                                                                                                                                                                  |                                                                                         |                             |
|----|-------------------------------------|-------------------------------------------------------------------------------------------------------------------------------------------------------------------------------------------------------|------------------------------------------------------------------------------------------------------------------------------------------------------------------|-----------------------------------------------------------------------------------------|-----------------------------|
|    |                                     | <i>Syringa vulgaris</i> , <i>S. amurensis</i> F. Oleaceae;<br><i>Lilium cordatum</i> F. Liliaceae;<br><i>Codonopsis tangshen</i> F. Campanulaceae;<br><i>Eleutherococcus senticosus</i> F. Araliaceae |                                                                                                                                                                  | Immunomodulating activity                                                               | (Zapesochnaya et al., 1995) |
|    |                                     |                                                                                                                                                                                                       |                                                                                                                                                                  |                                                                                         |                             |
| 76 | Cistanoside A                       | <i>Cistanches</i> species F. Orobanchaceae                                                                                                                                                            | R <sub>1</sub> = H; R <sub>2</sub> = α-rhamnosyl; R <sub>3</sub> = caffeoyl; R <sub>4</sub> = β-glucosyl; R <sub>5</sub> = OH; R <sub>6</sub> = OCH <sub>3</sub> | Protective effects on both sex and learning behaviors in the hanging stress loaded mice | (Pan et al., 2003)          |
|    |                                     | <i>Cistanche deserticola</i> F. Orobanchaceae                                                                                                                                                         |                                                                                                                                                                  | Antioxidative and free radical scavenging activities                                    | (Pan et al., 2003)          |
| 77 | Tubuloside A                        | <i>Cistanche deserticola</i> F. Orobanchaceae                                                                                                                                                         | R <sub>1</sub> = Ac; R <sub>2</sub> = α-rhamnosyl; R <sub>3</sub> = caffeoyl; R <sub>4</sub> = β-glucosyl; R <sub>5</sub> = R <sub>6</sub> = OH                  | Antioxidative and free radical scavenging activities                                    | (Pan et al., 2003)          |
| 78 | Syringalide A 3'-α-rhamnopyranoside | <i>Cistanche deserticola</i> F. Orobanchaceae                                                                                                                                                         | R <sub>1</sub> = H; R <sub>2</sub> = α-rhamnosyl; R <sub>3</sub> = caffeoyl; R <sub>4</sub> = R <sub>5</sub> = H; R <sub>6</sub> = OH                            | Antioxidative and free radical scavenging activities                                    | (Pan et al., 2003)          |

|                                                                                    |                                                                                                                                                                               |                                                                       |                                                                                    |                                                                        |                                             |
|------------------------------------------------------------------------------------|-------------------------------------------------------------------------------------------------------------------------------------------------------------------------------|-----------------------------------------------------------------------|------------------------------------------------------------------------------------|------------------------------------------------------------------------|---------------------------------------------|
| 79                                                                                 | Suspensaside                                                                                                                                                                  | <i>Forsythiae suspensa</i><br>& <i>F. viridisscima</i> F.<br>Oleaceae | 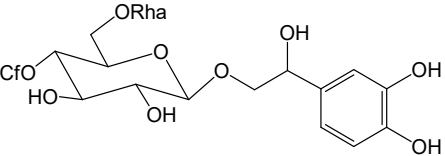 | Change the activity of some enzymes and antioxidant activity           | (Pan et al., 2003)                          |
| 80                                                                                 | $\beta$ -Hydroxyacteoside                                                                                                                                                     | <i>Forsythiae suspensa</i><br>& <i>F. viridisscima</i> F.<br>Oleaceae |  | Change the activity of some enzymes and antioxidant activity           | (Pan et al., 2003)                          |
| 81                                                                                 | 6-O-Caffeoyl- $\beta$ -O-glucose                                                                                                                                              | <i>Caryopteris incana</i> F.<br>Lamiaceae                             |  | Antioxidative and free radical scavenging activities                   | (Pan et al., 2003)                          |
|  |                                                                                                                                                                               |                                                                       |                                                                                    |                                                                        |                                             |
| 82                                                                                 | 2-(3-Hydroxy-4-methoxy-phenyl)-ethyl-O-( $\alpha$ -L-rhamnosyl)-(1 $\rightarrow$ 3)-O-( $\alpha$ -L-rhamnosyl)-(1 $\rightarrow$ 6)-4-O-E-feruloyl- $\beta$ -D-glucopyranoside | <i>Digitalis purpurea</i> F.<br>Scrophulariaceae                      | $R_1 = R_2 = \alpha$ -rhamnosyl; $R_3 = R_4 = \text{CH}_3$                         | Inhibitory activity against PKCR<br>$\text{IC}_{50}$ 125 $\mu\text{M}$ | (Zhou et al., 1998)                         |
| 83                                                                                 | Calceolarioside A                                                                                                                                                             | <i>Digitalis purpurea</i> F.<br>Scrophulariaceae                      | $R_1 = R_2 = R_3 = R_4 = \text{H}$                                                 | Inhibitory activity against PKCR<br>$\text{IC}_{50}$ 0.6 $\mu\text{M}$ | (Zhou et al., 1998)                         |
|                                                                                    |                                                                                                                                                                               | <i>Globularia orientalis</i> F.<br>Plantaginaceae                     |                                                                                    | Antioxidant activity<br>$\text{IC}_{50}$ 0.04 $\mu\text{M}$            | (Heilmann et al., 2000); (Pan et al., 2003) |



|                                                                                    |                                   |                                                                                |                                                                                                                                                |                                                                      |                                                   |
|------------------------------------------------------------------------------------|-----------------------------------|--------------------------------------------------------------------------------|------------------------------------------------------------------------------------------------------------------------------------------------|----------------------------------------------------------------------|---------------------------------------------------|
| 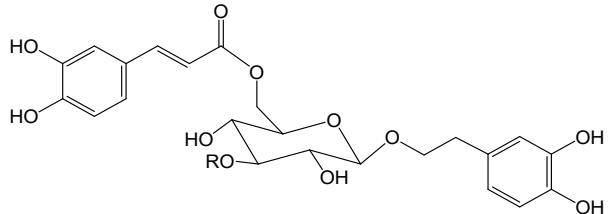 |                                   |                                                                                |                                                                                                                                                |                                                                      |                                                   |
| 84                                                                                 | Plantainoside D                   | <i>Digitalis purpurea</i> F.<br>Scrophulariaceae                               | R = $\beta$ -glucosyl                                                                                                                          | Inhibitory activity<br>against PKCR<br>IC <sub>50</sub> 14.8 $\mu$ M | (Zhou et al.,<br>1998)                            |
|  |                                   |                                                                                |                                                                                                                                                |                                                                      |                                                   |
| 85                                                                                 | Cistanoside F                     | <i>Cistanche deserticola</i> F.<br>Orobanchaceae                               |                                                                                                                                                | Antioxidative and<br>free radical<br>scavenging activity             | (Pan et al.,<br>2003)                             |
|  |                                   |                                                                                |                                                                                                                                                |                                                                      |                                                   |
| 86                                                                                 | Isomartynoside                    | <i>Galeopsis pubescens</i> F.<br>Lamiaceae                                     | R <sub>1</sub> = feruloyl; R <sub>2</sub> = H; R <sub>3</sub> = $\alpha$ -<br>rhamnosyl; R <sub>4</sub> = CH <sub>3</sub> = R <sub>5</sub> = H | Antioxidant<br>activity<br>IC <sub>50</sub> 0.17 $\mu$ M             | (Heilmann et<br>al., 2000); (Pan<br>et al., 2003) |
| 87                                                                                 | Lugrandoside                      | <i>Digitalis ferruginea</i><br>subsp. <i>ferruginea</i> F.<br>Scrophulariaceae | R <sub>1</sub> = $\beta$ -glucosyl; R <sub>2</sub> = caffeoyl; R <sub>3</sub> =<br>R <sub>4</sub> = R <sub>5</sub> = H                         | Antioxidant<br>activity<br>IC <sub>50</sub> 0.04 $\mu$ M             | (Heilmann et<br>al., 2000); (Pan<br>et al., 2003) |
| 88                                                                                 | Ferruginoside B                   | <i>Digitalis ferruginea</i><br>subsp. <i>ferruginea</i> F.<br>Scrophulariaceae | R <sub>1</sub> = $\beta$ -glucosyl; R <sub>2</sub> = R <sub>3</sub> = R <sub>4</sub> = R <sub>5</sub> =<br>H                                   | Antioxidant<br>activity<br>IC <sub>50</sub> 1.9 $\mu$ M              | (Heilmann et<br>al., 2000); (Pan<br>et al., 2003) |
| 89                                                                                 | Darendoside B                     | <i>Scutellaria orientalis</i><br>subsp. <i>pinnatifida</i> F.<br>Lamiaceae     | R <sub>1</sub> = R <sub>2</sub> = H; R <sub>3</sub> = $\alpha$ -rhamnosyl; R <sub>4</sub> =<br>CH <sub>3</sub> ; R <sub>5</sub> = H            | Antioxidant<br>activity<br>IC <sub>50</sub> 3.6 $\mu$ M              | (Heilmann et<br>al., 2000); (Pan<br>et al., 2003) |
| 90                                                                                 | Deacylacteoside dimethyl<br>ether | <i>Incarvillea sinensis</i> var.<br><i>przewalskii</i> F.                      | R <sub>1</sub> = R <sub>2</sub> = H; R <sub>3</sub> = $\alpha$ -rhamnosyl; R <sub>4</sub> =<br>R <sub>5</sub> = CH <sub>3</sub>                | Antioxidant<br>activity                                              | (Heilmann et<br>al., 2000); (Pan                  |

|    |                                   |                                                                      |                                                                                                                                            |                                                      |                                             |
|----|-----------------------------------|----------------------------------------------------------------------|--------------------------------------------------------------------------------------------------------------------------------------------|------------------------------------------------------|---------------------------------------------|
|    |                                   | Bignoniaceae                                                         |                                                                                                                                            | IC <sub>50</sub> 8.5 μM                              | et al., 2003)                               |
| 91 | Leucosceptoside B                 | <i>Marrubium alysson</i> F.<br>Lamiaceae                             | R <sub>1</sub> = β-apiosyl; R <sub>2</sub> = feruloyl; R <sub>3</sub> = α-rhamnosyl; R <sub>4</sub> = CH <sub>3</sub> ; R <sub>5</sub> = H | Antioxidant activity<br>IC <sub>50</sub> 0.17 μM     | (Heilmann et al., 2000); (Pan et al., 2003) |
| 92 | Alyssonoside                      | <i>Phlomis grandiflora</i> var. <i>fimbrilligera</i> F.<br>Lamiaceae | R <sub>1</sub> = β-apiosyl; R <sub>2</sub> = feruloyl; R <sub>3</sub> = α-rhamnosyl; R <sub>4</sub> = R <sub>5</sub> = H                   | Antioxidant activity<br>IC <sub>50</sub> 0.15 μM     | (Heilmann et al., 2000); (Pan et al., 2003) |
|    |                                   |                                                                      |                                                                                                                                            |                                                      |                                             |
| 93 | Hattushoside                      | <i>Phlomis grandiflora</i> var. <i>fimbrilligera</i> F.<br>Lamiaceae | R = Syringyl                                                                                                                               | Antioxidant activity<br>IC <sub>50</sub> 0.35 μM     | (Heilmann et al., 2000); (Pan et al., 2003) |
| 94 | Phlomisethanoside                 | <i>Phlomis grandiflora</i> var. <i>fimbrilligera</i> F.<br>Lamiaceae | R = Vanilloyl                                                                                                                              | Antioxidant activity<br>IC <sub>50</sub> 0.04 μM     | (Heilmann et al., 2000); (Pan et al., 2003) |
|    |                                   |                                                                      |                                                                                                                                            |                                                      |                                             |
| 95 | Ligupurpurososide A               | <i>Ligustrum purpurascens</i> F.<br>Oleaceae                         | R <sub>1</sub> = R <sub>2</sub> = OH; R <sub>3</sub> = H                                                                                   | Antioxidative and free radical scavenging activities | (Pan et al., 2003)                          |
| 96 | <i>Trans</i> -Ligupurpurososide B | <i>Ligustrum purpurascens</i> F.<br>Oleaceae                         | R <sub>1</sub> = R <sub>2</sub> = H; R <sub>3</sub> = α-rhamnosyl                                                                          | Antioxidative and free radical scavenging activities | (Pan et al., 2003)                          |

|                                                                                    |                               |                                                 |                                                                                    |                                                               |                         |
|------------------------------------------------------------------------------------|-------------------------------|-------------------------------------------------|------------------------------------------------------------------------------------|---------------------------------------------------------------|-------------------------|
| 97                                                                                 | Osmanthuside B                | <i>Ligustrum purpurascens</i><br>F. Oleaceae    | $R_1 = R_2 = R_3 = H$                                                              | Antioxidative and<br>free radical<br>scavenging<br>activities | (Pan et al.,<br>2003)   |
| 98                                                                                 | <i>Cis</i> -Ligupurpuroside B | <i>Ligustrum purpurascens</i><br>F. Oleaceae    | 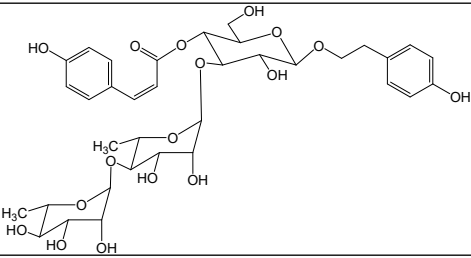 | Antioxidative and<br>free radical<br>scavenging<br>activities | (Pan et al.,<br>2003)   |
|  |                               |                                                 |                                                                                    |                                                               |                         |
| 99                                                                                 | Hydropiperoside               | <i>Persicaria orientalis</i> F.<br>Polygonaceae | $R_1 = R_2 = R_3 = H$                                                              | Inhibitor of<br>melanogenesis                                 | (Masum et al.,<br>2019) |
| 100                                                                                | Vanicoside A                  | <i>Persicaria orientalis</i> F.<br>Polygonaceae | $R_1 = \text{feruloyl}; R_2 = \text{Ac}; R_3 = H$                                  | Inhibitor of<br>melanogenesis                                 | (Masum et al.,<br>2019) |
| 101                                                                                | Vanicoside B                  | <i>Persicaria orientalis</i> F.<br>Polygonaceae | $R_1 = \text{feruloyl}; R_2 = R_3 = H$                                             | Inhibitor of<br>melanogenesis                                 | (Masum et al.,<br>2019) |
| 102                                                                                | Vanicoside C                  | <i>Persicaria orientalis</i> F.<br>Polygonaceae | $R_1 = R_3 = H; R_2 = \text{Ac}$                                                   | Inhibitor of<br>melanogenesis                                 | (Masum et al.,<br>2019) |
| 103                                                                                | Vanicoside E                  | <i>Persicaria orientalis</i> F.<br>Polygonaceae | $R_1 = \text{feruloyl}; R_2 = R_3 = \text{Ac}$                                     | Inhibitor of<br>melanogenesis                                 | (Masum et al.,<br>2019) |

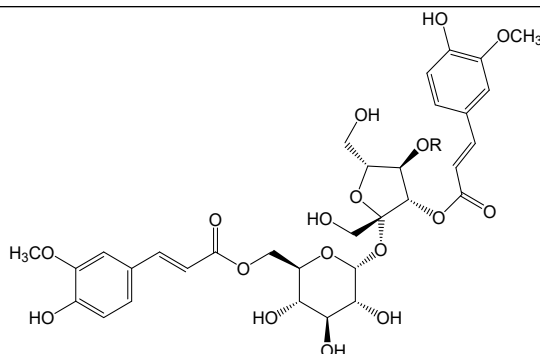

|     |                                                        |                                                  |        |                                                                                                                                |                                                |
|-----|--------------------------------------------------------|--------------------------------------------------|--------|--------------------------------------------------------------------------------------------------------------------------------|------------------------------------------------|
| 104 | 3,6'- <i>O</i> -Diferuloyl-sucrose                     | <i>Lilium longiflorum</i> F.<br>Liliaceae        | R = H  | DPP-IV inhibitory activity<br>IC <sub>50</sub> 46.19                                                                           | (Kim et al., 2020)                             |
| 105 | 4- <i>O</i> -Acetyl-3,6'- <i>O</i> -diferuloyl-sucrose | <i>Lilium longiflorum</i> F.<br>Liliaceae        | R = Ac | DPP-IV inhibitory activity<br>IC <sub>50</sub> 63.26 μM                                                                        | (Kim et al., 2020)                             |
| 106 | (+)-Liriodenol                                         | <i>Liriodendron hybrid</i> F.<br>Magnoliaceae    |        | Cytotoxic effects against NIC-H460, BGC-823, SGC-7901 and MDA-MB-231<br>IC <sub>50</sub> 31, 45, 34 and 29 mg/mL, respectively | (Yang et al., 2015);<br>(Teponno et al., 2016) |
| 107 | (+)-Lariciresinol                                      | <i>Wikstroemia elliptica</i> F.<br>Thymelaeaceae |        | Anticancer activity                                                                                                            | (Saarinen et al., 2008); (Cui et al., 2020)    |

|     |                 |                                                       |                                                                                       |                                                                                                                                                                               |                        |
|-----|-----------------|-------------------------------------------------------|---------------------------------------------------------------------------------------|-------------------------------------------------------------------------------------------------------------------------------------------------------------------------------|------------------------|
| 108 | Glandularin     | <i>Glandularia</i> × <i>hybrida</i><br>F. Verbenaceae | 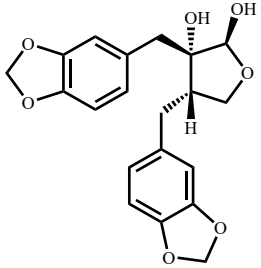   | Moderate cytotoxic activity against SK-MEL and VERO cells with IC <sub>50</sub> 45.6 and 37.6 μM, respectively. Moderate inhibition activity on iNOS IC <sub>50</sub> 49.7 μM | (Mohamed et al., 2022) |
| 109 | Phillyrin       | <i>Phillyrea latifolia</i> F.<br>Oleaceae             |     | <i>In vitro</i> anti-inflammatory activity. It inhibits the release of the cyclo-oxygenase metabolites prostaglandin E <sub>2</sub> IC <sub>50</sub> 45.6 μM                  | (Lanza et al., 2001)   |
| 110 | Epimagnolin B   | <i>Magnolia fargesii</i> F.<br>Magnoliaceae           |    | Anti-inflammatory activity by inhibition of the production of NO and PGE <sub>2</sub> and the expression of respective enzyme iNOS and COX-2                                  | (Teponno et al., 2016) |
| 111 | (+)-Pinoresinol | <i>Melia toosendan</i> F.<br>Meliaceae                |  | Potent ABTS free radical scavenging activity IC <sub>50</sub> 45.1 μM                                                                                                         | (Wang et al., 2014)    |

|     |                 |                                                 |                                                                                      |                                                                                                                                  |                                                |
|-----|-----------------|-------------------------------------------------|--------------------------------------------------------------------------------------|----------------------------------------------------------------------------------------------------------------------------------|------------------------------------------------|
| 112 | Khainaoside A   | <i>Vitex glabrata</i> F.<br>Verbenaceae         | 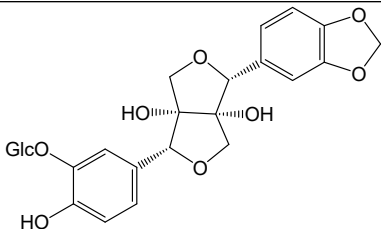  | Potent inhibitory effects on estrogen-enhanced cell proliferation                                                                | (Teponno et al., 2016)                         |
| 113 | Arctiidilactone | <i>Arctium lappa</i> F.<br>Asteraceae           |    | Potent anti-inflammatory and exhibited 75.51, 70.72, and 61.17% inhibition at 10, 1, and 0.1 μM, respectively                    | (Yang et al., 2015);<br>(Teponno et al., 2016) |
| 114 | Ligraminol A    | <i>Acorus gramineus</i> F.<br>Araceae           |    | Active against the SK-MEL-2 cell line<br>IC <sub>50</sub> 4.5 μM                                                                 | (Teponno et al., 2016)                         |
| 115 | Ramonanin A     | <i>Guaiacum officinale</i> F.<br>Zygophyllaceae |  | Moderate <i>in vitro</i> cytotoxic activities against human breast cancer cell lines and induced cell death <i>via</i> apoptosis | (Teponno et al., 2016)                         |

|     |                                                                                                                                    |                                                     |                                                                                       |                                                                                                                                             |                                                 |
|-----|------------------------------------------------------------------------------------------------------------------------------------|-----------------------------------------------------|---------------------------------------------------------------------------------------|---------------------------------------------------------------------------------------------------------------------------------------------|-------------------------------------------------|
| 116 | (7, 8-Trans-8, 8'-trans-7', 8'-trans)-7- (3,4-methylenedioxyphenyl)-8-methyl-8'-methyl-7'-(3',4'- dihydroxyphenyl)-tetrahydrofuran | <i>Schisandra sphenanthera</i> F.<br>Schisandraceae | 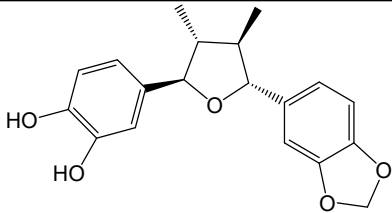    | Anti-oxidative haemolysis of human red blood cells (RBCs) activity<br>IC <sub>50</sub> 35 µg/mL                                             | (Jiang et al., 2015);<br>(Teponno et al., 2016) |
| 117 | Neglschisandrin F                                                                                                                  | <i>Schisandra neglecta</i> F.<br>Schisandraceae     |    | It exhibited marginal cytotoxicity against the human lung carcinoma A549 cell line with EC <sub>50</sub> values of 12 µg/mL                 | (Teponno et al., 2016)                          |
| 118 | Tiliamuroside B                                                                                                                    | <i>Tilia amurensis</i> F.<br>Tiliaceae              |    | Significant cytotoxicity against A549, SK-OV-3, SK-MEL-2, and HCT-15 cell lines<br>IC <sub>50</sub> 7.3, 8.9, 7.8 and 6.2 µM, respectively. | (Kim et al., 2012)                              |
| 119 | (+)-Ovafolinin B-9'-O-β-D-glucopyranoside                                                                                          | <i>Eurya japonica</i> F.<br>Theaceae                |  | Potent antioxidant activity<br>ED <sub>50</sub> 23                                                                                          | (Teponno et al., 2016)                          |

|     |                                                   |                                                      |                                                                                       |                                                                                                                                                   |                                              |
|-----|---------------------------------------------------|------------------------------------------------------|---------------------------------------------------------------------------------------|---------------------------------------------------------------------------------------------------------------------------------------------------|----------------------------------------------|
| 120 | Cleistantoxin                                     | <i>Cleistanthus indochnensis</i> F.<br>Euphorbiaceae | 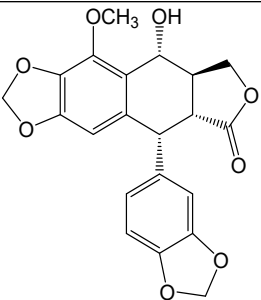   | Strong cytotoxic activity against KB, MCF-7, HT29 and MCF-7R cancer cell lines<br>IC <sub>50</sub> 0.02, 0.04, 0.01 and 0.03 μM, respectively     | (Teponno et al., 2016); (Thanh et al., 2012) |
| 121 | 3α-O-(β-D - Glucopyranosyl)desoxy-podophyllotoxin | <i>Cleistanthus boivinianus</i> F.<br>Euphorbiaceae  |    | Active against A2780 ovarian cancer and HCT-116 human colon carcinoma cell lines.<br>IC <sub>50</sub> 33.0 ± 3.6 nM and 20.5 nM, respectively     | (Liu et al., 2015)                           |
| 122 | Deoxypicropodophyllotoxin                         | <i>Cleistanthus boivinianus</i> F.<br>Euphorbiaceae  |   | Active against A2780 ovarian cancer cell line<br>IC <sub>50</sub> >10 μM                                                                          | (Liu et al., 2015)                           |
| 123 | (±)-β-Apopicropodophyllin                         | <i>Cleistanthus boivinianus</i> F.<br>Euphorbiaceae  |  | Potent activity against the A2780 ovarian cancer cell line<br>IC <sub>50</sub> 63.1 ± 6.7nM.<br>Modest activity against the A2058 human caucasian | (Liu et al., 2015)                           |



|     |                                    |                                                     |                         |                                                                                                                  |                    |
|-----|------------------------------------|-----------------------------------------------------|-------------------------|------------------------------------------------------------------------------------------------------------------|--------------------|
|     |                                    |                                                     |                         | metastatic melanoma and MES-SA human uterine sarcoma cell lines<br>IC <sub>50</sub> 4.6 and 4.0 μM, respectively |                    |
|     |                                    |                                                     |                         |                                                                                                                  |                    |
| 124 | (-)-Desoxypodophyllotoxin          | <i>Cleistanthus boivinianus</i><br>F. Euphorbiaceae | R = H                   | Potent activity against the A2780 ovarian cancer cell line<br>IC <sub>50</sub> 230 ± 1 nM                        | (Liu et al., 2015) |
| 125 | β-Peltatin-5-O-β-D-glucopyranoside | <i>Cleistanthus boivinianus</i><br>F. Euphorbiaceae | R = O-β-D-glucopyranose | Moderate activity against the A2780<br>IC <sub>50</sub> 4.9 ± 0.1 μM                                             | (Liu et al., 2015) |
| 126 | Conidendrin                        | <i>Abies holophylla</i> F.<br>Pinaceae              |                         | Moderately inhibited NO production<br>IC <sub>50</sub> 28.5 μM                                                   | (Kim et al., 2013) |

|     |                                      |                                               |                                                                                       |                                                                                                                                   |                        |
|-----|--------------------------------------|-----------------------------------------------|---------------------------------------------------------------------------------------|-----------------------------------------------------------------------------------------------------------------------------------|------------------------|
| 127 | Myrifralignan C                      | <i>Myristica fragrans</i> F.<br>Myristicaceae | 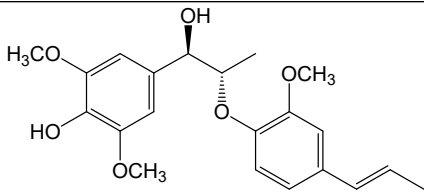    | Potent inhibitory activity against the production of nitric oxide (NO) in the RAW264.7 cell line stimulated by lipopolysaccharide | (Teponno et al., 2016) |
| 128 | Meliasendanin A                      | <i>Melia toosendan</i> F.<br>Meliaceae        |    | Stronger ABTS free radical scavenging activity<br>IC <sub>50</sub> 62.8 μM                                                        | (Wang et al., 2014)    |
| 129 | Euryalin B                           | <i>Euryale ferox</i> F.<br>Nymphaeaceae       |     | Strong effect against DPPH assay<br>SC <sub>50</sub> 6.8 μM                                                                       | (Teponno et al., 2016) |
| 130 | 7 <i>R</i> ,8 <i>S</i> -Balanophonin | <i>Crataegus pinnatifida</i> F.<br>Rosaceae   |    | Potent cytotoxic activity against the HT-1080 cell line<br>IC <sub>50</sub> = 8.86 μM                                             | (Huang et al., 2013)   |
| 131 | Tatarinan S                          | <i>Acorus tatarinowii</i> F.<br>Araceae       |    | Potential protective effect against β-amyloid toxicity, its value of PT50 extended up to 62.3% at 100 μM                          | (Luo et al., 2016)     |
| 132 | Penthorin B                          | <i>Penthorum chinense</i> F.<br>Saxifragaceae |  | <i>In vitro</i> protective activities against acetaminophen-induced hepatocyte injury, the inhibition was calculated as 15.0%     | (He et al., 2015)      |

|     |           |                                         |                                                                                      |                                                                                                                                       |                           |
|-----|-----------|-----------------------------------------|--------------------------------------------------------------------------------------|---------------------------------------------------------------------------------------------------------------------------------------|---------------------------|
| 133 | Tatanan A | <i>Acorus tatarinowii</i> F.<br>Araceae | 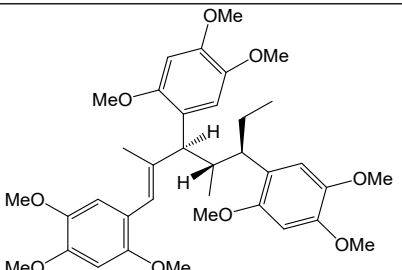   | at 5 $\mu$ M<br>Potently increase<br>Glucokinase (GK)<br>enzymatic activity<br>EC <sub>1,5</sub> 0.16–1.85<br>$\mu$ M                 | (Ni et al., 2011)         |
| 134 | Tatanan B | <i>Acorus tatarinowii</i> F.<br>Araceae |    | Potently increase<br>Glucokinase (GK)<br>enzymatic activity<br>EC <sub>1,5</sub> 0.16–1.85<br>$\mu$ M                                 | (Ni et al., 2011)         |
| 135 | Hovenin A | <i>Hovenia acerba</i> F.<br>Rhamnaceae  |    | Moderate inhibition<br>on the production<br>of NO and IL-6 in<br>LPS-stimulated<br>RAW264.7 cells<br>IC <sub>50</sub> 45 – 63 $\mu$ M | (Teponno et al.,<br>2016) |
| 136 | Hovenin B | <i>Hovenia acerba</i> F.<br>Rhamnaceae  |   | Moderate inhibition<br>on the production<br>of NO and IL-6 in<br>LPS-stimulated<br>RAW264.7 cells<br>IC <sub>50</sub> 45 – 63 $\mu$ M | (Teponno et al.,<br>2016) |
| 137 | Hovenin C | <i>Hovenia acerba</i> F.<br>Rhamnaceae  |  | Moderate inhibition<br>on the production<br>of NO and IL-6 in<br>LPS-stimulated<br>RAW264.7 cells<br>IC <sub>50</sub> 45 – 63 $\mu$ M | (Teponno et al.,<br>2016) |

|     |           |                                        |                                                                                    |                                                                                                                     |                        |
|-----|-----------|----------------------------------------|------------------------------------------------------------------------------------|---------------------------------------------------------------------------------------------------------------------|------------------------|
| 138 | Hovenin D | <i>Hovenia acerba</i> F.<br>Rhamnaceae | 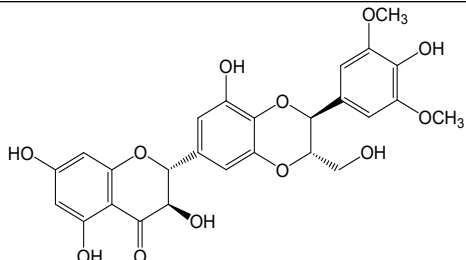 | Moderate inhibition on the production of NO and IL-6 in LPS-stimulated RAW264.7 cells<br>IC <sub>50</sub> 45– 63 μM | (Teponno et al., 2016) |
|-----|-----------|----------------------------------------|------------------------------------------------------------------------------------|---------------------------------------------------------------------------------------------------------------------|------------------------|

## References

- Abdel-Mageed, W.M., Backheet, E.Y., Khalifa, A.A., Ibraheim, Z.Z., Ross, S.A., 2012. Antiparasitic antioxidant phenylpropanoids and iridoid glycosides from *Tecoma mollis*. *Fitoterapia* 83, 500–507.
- Andrade-neto, V.F. De, Silva, T., Lopes, L.M.X., Rosa, E., Varotti, F.D.P., Krettli, A.U., 2007. Antiplasmodial Activity of Aryltetralone Lignans from *Holostylis reniformis* □ 51, 2346–2350.
- Antika, L.D., Dewi, R.M., 2021. The pharmacological properties of silymarin and its constituents. *Nat. Prod. Sci.* 27, 68–77.
- Astani, A., Schnitzler, P., Reichling, J., 2011. Screening for antiviral activities of isolated compounds from essential oils. *Evidence-based Complement. Altern. Med.* 2011.
- Bermejo, P., Abad, M. jose, Díaz, A.M., Fernández, L., Santos, J. De, Sanchez, S., Villaescusa, L., Carrasco, L., Irurzun, A., 2002. Antiviral Activity of seven iridoids. *Planta Med.* 68, 106–110.
- Bloor, S.J., 1992. Antiviral phloroglucinols from New Zeland *Kunzea* species. *J. Nat. Med.* 55, 43–47.
- Carlis, M.S. de P., Féboli, A., Laurentiz, A.C. de, Filardi, R. da S., Oliveria, A.H.P. de, e Silva, M.L.A., Anjos, L.A. dos, Magalhães, L.G., de Laurentiz, R. da S., 2019. Veterinary Parasitology In vitro anthelmintic activity of the crude hydroalcoholic extract of *Piper cubeba* fruits and isolated natural products against gastrointestinal nematodes in sheep. *Vet. Parasitol.* 275, 108932.

- Chauhan, K., Kaur, G., Kaur, S., 2019. Evaluation of antileishmanial efficacy of Salidroside against the SSG-sensitive and resistant strain of *Leishmania donovani*. *Parasitol. Int.* 72, 101928.
- Chen, M., Kilgore, N., Lee, K.H., Chen, D.F., 2006. Rubrisandrins A and B, lignans and related anti-HIV compounds from *Schisandra rubriflora*. *J. Nat. Prod.* 69, 1697–1701.
- Chen, W., Tan, H., Liu, Q., Zheng, X., Zhang, H., Liu, Y., Xu, L., 2019. A review: The bioactivities and pharmacological applications of *phellinus linteus*. *Molecules* 24, 1–24.
- Chowdhury, S., Mukherjee, T., Mukhopadhyay, R., Mukherjee, B., Sengupta, S., Chattopadhyay, S., Jaisankar, P., Roy, S., Majumder, H.K., 2012. The lignan niranthin poisons *Leishmania donovani* topoisomerase IB and favours a Th1 immune response in mice. *EMBO Mol. Med.* 4, 1126–1143.
- Cui, Q., Du, R., Liu, M., Rong, L., 2020. Lignans and Their Derivatives from Plants as Antivirals. *Molecules* 1–17.
- Dang, J., Shao, Y., Zhao, J., Mei, L., Tao, Y., Wang, Q., Zhang, L., 2016. Two-dimensional hydrophilic interaction chromatography × reversed-phase liquid chromatography for the preparative isolation of potential anti-hepatitis phenylpropanoids from *Salvia prattii*. *J. Sep. Sci.* 39, 3327–3338.
- Di Giorgio, C., Delmas, F., Akhmedjanova, V., Ollivier, E., Bessonova, I., Riad, E., Timon-David, P., 2005. In vitro antileishmanial activity of diphyllin isolated from *Haplophyllum bucharicum*. *Planta Med.* 71, 366–369.
- Esperandim, V.R., da Silva Ferreira, D., Rezende, K.C.S., Cunha, W.R., Saraiva, J., Bastos, J.K., e Silva, M.L.A., de Albuquerque, S., 2013. Evaluation of the in vivo therapeutic properties of (-)-cubebin and (-)-hinokinin against *Trypanosoma cruzi*. *Exp. Parasitol.* 133, 442–446.
- Fanhchaksai, K., Kodchakorn, K., Pothacharoen, P., Kongtawelert, P., 2016. Effect of sesamin against cytokine production from influenza type A H1N1-induced peripheral blood mononuclear cells: computational and experimental studies. *Vitr. Cell. Dev. Biol. - Anim.* 52, 107–119.
- Fordjour, P.A., Adjimani, J.P., Asare, B., Duah-Quashie, N.O., Quashie, N.B., 2020. Anti-malarial Activity Of Phenolic Acids Is Structurally Related. *Malar. J.* 1–13.
- Frezza, C., Venditti, A., Toniolo, C., Vita, D. De, Serafini, I., Cicc, A., Franceschin, M., Ventrone, A., Tomassini,

- L., Foddai, S., Guiso, M., Nicoletti, M., Bianco, A., 2019. *Pedicularis* L. Genus: Systematics, Botany, Phytochemistry, Chemotaxonomy, Ethnopharmacology, and Other.
- Gao, X.M., Pu, J.X., Huang, S.X., Yang, L.M., Huang, H., Xiao, W.L., Zheng, Y.T., Sun, H.D., 2008. Lignans from *Kadsura angustifolia*. *J. Nat. Prod.* 71, 558–563.
- He, Y., Zou, Y., Peng, C., Liu, J., He, C., Guo, L., 2015. Fitoterapia Penthorin A and B , two unusual 2 , 4 ' - epoxy-8 , 5 ' -neolignans from *Penthorum chinese*. *Fitoterapia* 100, 7–10.
- Heilmann, J., Palis, I., Kirmizibekmez, H., Schühly, W., Harput, S., Sticher, O., 2000. Radical Scavenger Activity of Phenylethanoid Glycosides in FMLP Stimulated Human Polymorphonuclear Leukocytes : Structure-Activity Relationships. *Planta Med* 66, 746–748.
- Hu, Q.F., Mu, H.X., Huang, H.T., Lv, H.Y., Li, S.L., Tu, P.F., Li, G.P., 2011. Secolignans, neolignans and phenylpropanoids from *Daphne feddei* and their biological activities. *Chem. Pharm. Bull.* 59, 1421–1424.
- Huang, X., Zhou, C., Li, L., Peng, Y., Lou, L., Liu, S., 2013. Fitoterapia Cytotoxic and antioxidant dihydrobenzofuran neolignans from the seeds of *Crataegus pinnatifida*. *Fitoterapia* 91, 217–223.
- Hwang, B.S., Lee, M.S., Lee, S.W., Lee, I.K., Seo, G.S., Choi, H.J., Yun, B.S., 2018. Neuraminidase inhibitors from the fermentation broth of *Phellinus linteus*. *Mycobiology* 42, 189–192.
- Hwang, D. Il, Won, K., Kim, D., Kim, B., Lee, H.M., 2017. Cinnamyl Alcohol , the Bioactive Component of Chestnut Flower Absolute , Inhibits Adipocyte Differentiation in 3T3-L1 Cells by Downregulating Adipogenic Transcription Factors 45, 1–14.
- Ilijeva, R., Buchbauer, G., 2016. Biological properties of some volatile phenylpropanoids. *Nat. Prod. Commun.* 11, 1619–1629.
- Indriani, Aminah, N.S., Puspaningsih, N.N.T., Hasna, I.H., Takaya, Y., Satrimafitrah, P., 2021. Vladinol f, neolignan compound from the stem bark of *Dryobalanops oblongifolia* (Dipterocarpaceae) and antiplasmodial activity. *Rasayan J. Chem.* 14, 161–165.
- Jansi, R.S., Khusro, A., Agastian, P., Alfarhan, A., Al-dhabi, N.A., 2021. Emerging paradigms of viral diseases and

paramount role of natural resources as antiviral agents.

- Jiang, K., Song, Q., Peng, S., Zhao, Q., Li, G., Li, Y., Gao, K., 2015. *Fitoterapia* New lignans from the roots of *Schisandra sphenanthera* 103, 63–70.
- Kernan, M.R., Amarquaye, A., Chen, J.L., Chan, J., Sesin, D.F., Parkinson, N., Ye, Z.J., Barrett, M., Bales, C., Stoddart, C.A., Sloan, B., Blanc, P., Limbach, C., Mrisho, S., Rozhon, E.J., 1998. Antiviral phenylpropanoid glycosides from the medicinal plant *Markhamia lutea*. *J. Nat. Prod.* 61, 564–570.
- Kim, B.R., Thapa, P., Kim, H.M., Jin, C.H., Kim, S.H., Kim, J.B., Choi, H., Han, A.R., Nam, J.W., 2020. Purification of Phenylpropanoids from the Scaly Bulbs of *Lilium Longiflorum* by CPC and Determination of Their DPP-IV Inhibitory Potentials. *ACS Omega* 5, 4050–4057.
- Kim, C.S., Kwon, O.W., Kim, S.Y., Lee, K.R., 2013. Bioactive Lignans from the Trunk of *Abies holophylla*. *J. Nat. Prod.* 76, 2131–2135.
- Kim, K.H., Kim, Y.H., Lee, K.R., 2010. Isolation of Hepatoprotective phenylpropanoid from *Lactuca indica*. *Nat. Prod. Sci.* 16, 6–9.
- Kim, K.H., Moon, E., Kim, S.Y., Sang Un Choi, Lee, K.R., 2012. Lignan constituents of *Tilia amurensis* and their biological evaluation on antitumor and anti-inflammatory activities. *FOOD Chem. Toxicol.* 50, 3680–3686.
- Kim, S.R., Kim, Y.C., 2000. Neuroprotective phenylpropanoid esters of rhamnose isolated from roots of *Scrophularia buergeriana*. *Phytochemistry* 54, 503–509.
- Kiplimo, J.J., Koorbanally, N.A., 2012. *Phytochemistry Letters* Antibacterial activity of an epoxidised prenylated cinnamaldehyde derivative from *Vepris glomerata*. *Phytochem. Lett.* 5, 438–442.
- Kurkin, V.A., 2003. Phenylpropanoids from medicinal plants: : Distribution, Classification, Structural analysis, and Biological activity. *Chem. Nat. Compd.* 39, 87–110.
- Lanza, A.M.D., Martínez, M.J.A., Matellano, L.F., Carretero, C.R., Castillo, L.V., María, A.S. Sen, Benito, P.B., 2001. In the course of our research for anti-inflammatory activity from medicinal plants, we have studied the constituents of. *Planta Med* 67, 219–223.

- Latif, A., Du, Y., Dalal, S.R., Fernández-Murga, M.L., Merino, E.F., Casserac, M.B., Goetze, M., Kingstona, D.G.I., 2017. Bioactive Neolignans and Other Compounds from *Magnolia grandiflora* L.: Isolation and Antiplasmodial Activity. *Chem Biodivers.* 14, 371–390.
- Lee, J., Scagel, C.F., 2013. Chicoric acid: Chemistry, distribution, and production. *Front. Chem.* 1, 1–17.
- Li, Jun, Huang, Y., Guan, X.L., Li, Jian, Deng, S.P., Wu, Q., Zhang, Y.J., Su, X.J., Yang, R.Y., 2012. Anti-hepatitis B virus constituents from the stem bark of *Streblus asper*. *Phytochemistry* 82, 100–109.
- Li, X.N., Pu, J.X., Du, X., Yang, L.M., An, H.M., Lei, C., He, F., Luo, X., Zheng, Y.T., Lu, Y., Xiao, W.L., Sun, H.D., 2009. Lignans with anti-HIV activity from *Schisandra propinqua* var. *sinensis*. *J. Nat. Prod.* 72, 1133–1141.
- Liu, X., Ma, C., Liu, Z., Kang, W., 2020. Natural Products: Review for Their Effects of Anti-HBV. *Biomed Res. Int.* 2020.
- Liu, Y., Young, K., Rakotondraibe, L.H., Brodie, P.J., Wiley, J.D., Cassera, M.B., Callmander, M.W., Rakotondrajaona, R., Rakotobe, E., Rasamison, V.E., Tendyke, K., Shen, Y., Kingston, D.G.I., 2015. Antiproliferative Compounds from *Cleistanthus boivinianus* from the Madagascar Dry Forest 1. *J. Nat. Prod.* 78, 1543–1547.
- Lu, Y., Li, X., Mu, H., Huang, H., Li, G.P., Hu, Q., 2012. Bioactive phenylpropanoids from *Daphne feddei*. *J. Braz. Chem. Soc.* 23, 656–660.
- Luo, X., Zhang, Y., Chen, X., Sun, M., Li, S., Wang, H., 2016. Fitoterapia Lignans from the roots of *Acorus tatarinowii* Schott ameliorate  $\beta$  amyloid-induced toxicity in transgenic *Caenorhabditis elegans*. *Fitoterapia* 108, 5–8.
- Masum, M., Siwattrra, C., Yamauchi, K., Mitsunaga, T., 2019. CHEMISTRY Isolation of phenylpropanoid sucrose esters from the roots of *Persicaria orientalis* and their potential as inhibitors of melanogenesis. *Med. Chem. Res.* 28, 623–632.
- Misawa, T., Aoyama, H., Furuyama, T., Dodo, K., Sagawa, M., Miyachi, H., Kizaki, M., Hashimoto, Y., 2008.



Structural development of benzhydrol-type 1'-Acetoxychavicol Acetate (ACA) analogs as human leukemia cell-growth inhibitors based on Quantitative Structure-Activity Relationship (QSAR) analysis. *Chem. Pharm. Bull.* 56, 1490–1495.

Mohamed, N.M., Ahmed, M.A.M., Khan, S.I., Fronczek, F.R., Mohammed, A.F., Ross, S.A., 2022. Phytochemistry Anti-inflammatory and cytotoxic specialised metabolites from the leaves of *Glandularia × hybrida*. *Phytochemistry* 195, 113054.

Monzote, L., Perera Córdova, W.H., García, M., Piñón, A., Setzer, W.N., 2016. In-vitro and in-vivo activities of phenolic compounds against cutaneous leishmaniasis. *Rec. Nat. Prod.* 10, 269–276.

Morais, S.M. De, Vila-nova, N.S., Maria, C., Bevilaqua, L., Rondon, F.C., Lobo, C.H., Alencar, A. De, Noronha, A., Paula, A., Rodrigues, R., Campello, C.C., Wilson, M.E., Andrade, H.F. De, Quimica, D., City, I., City, I., Protozoologia, D., Eneas, A., Aguiar, D.C., 2014. Thymol and eugenol derivatives as potential antileishmanial agents. *Bioorg Med Chem* 22, 6250–6255.

Neelam, Khatkar, A., Sharma, K.K., 2020. Phenylpropanoids and its derivatives: biological activities and its role in food, pharmaceutical and cosmetic industries. *Crit. Rev. Food Sci. Nutr.* 60, 2655–2675.

Ni, G., Shen, Z., Lu, Y., Wang, Y., Tang, Y., Chen, R., Hao, Z., Yu, D., 2011. Glucokinase-Activating Sesquinlignans from the Rhizomes of *Acorus tatarinowii* Schott 2056–2061.

Omrani, M., Keshavarz, M., Nejad Ebrahimi, S., Mehrabi, M., McGaw, L.J., Ali Abdalla, M., Mehrbod, P., 2021. Potential Natural Products Against Respiratory Viruses: A Perspective to Develop Anti-COVID-19 Medicines. *Front. Pharmacol.* 11.

Ortet, R., Prado, S., Regalado, E.L., Valeriote, F.A., Media, J., Mendiola, J., Thomas, O.P., 2011. Furfuran lignans and a flavone from *Artemisia gorgonum* Webb and their in vitro activity against *Plasmodium falciparum*. *J. Ethnopharmacol.* 138, 637–640.

Pan, J., Yuan, C., Lin, C., Jia, Z., Zheng, R., 2003. Pharmacological activities and mechanisms of natural phenylpropanoid glycosides. *Pharmazie* 58, 767–75.

- Panchal, R., Ghosh, S., Mehla, R., Jayachandran Ramalingam, S.G., Mukherjee, S., Chowdhary, A., 2022. Antiviral Activity of Rosmarinic Acid Against Four Serotypes of Dengue Virus. *Curr Microbiol.* 79, 203.
- Parise-Filho, R., Pasqualoto, K.F.M., Magri, F.M.M., Ferreira, A.K., Da Silva, B.A.V.G., Damião, M.C.F.C.B., Tavares, M.T., Azevedo, R.A., Auada, A.V.V., Polli, M.C., Brandt, C.A., 2012. Dillapiole as antileishmanial agent: Discovery, cytotoxic activity and preliminary SAR studies of dillapiole analogues. *Arch. Pharm. (Weinheim)*. 345, 934–944.
- Perez G., R.M., 2003. Antiviral activity of compounds isolated from plants. *Pharm. Biol.* 41, 107–157.
- Pluymers, W., Neamati, N., Pannecouque, C., Fikkert, V., Marchand, C., Burke, J., Pommier, Y., Schols, D., De Clercq, E., Debyser, Z., Witvrouw, M., 2001. Erratum: Viral entry as the primary target for the anti-HIV activity of chicoric acid and its tetraacetyl esters (*Molecular Pharmacology* (2000) 58 (641-648)). *Mol. Pharmacol.* 59, 403.
- Poddar, A., Banerjee, A., Ghanta, S., Chattopadhyay, S., 2008. In vivo efficacy of calceolarioside A against experimental visceral leishmaniasis. *Planta Med.* 74, 503–508.
- Rye, C.E., Barker, D., 2013. Asymmetric synthesis and anti-protozoal activity of the 8,4'-oxyneolignans virolin, surinamensin and analogues. *Eur. J. Med. Chem.* 60, 240–248.
- Sá, R. de C., Andrade, L.N., de Oliveira, R. dos R.B., Sousa, D.P. de, 2014. A Review on Anti-Inflammatory Activity of Phenylpropanoids Found in Essential Oils. *Molecules* 19, 1459–1480.
- Saarinen, N.M., Warri, A., Dings, R.P.M., Airio, M., Smeds, A.I., Sari Makela, 2008. Dietary lariciresinol attenuates mammary tumor growth and reduces blood vessel density in human MCF-7 breast cancer xenografts and carcinogen-induced mammary tumors in rats. *Int. J. Cancer* 123, 1196–1204.
- Saracoglu, I., Inoue, M., Calis, I., Ogihara Yukio, 1995. Studies on constituents with cytotoxic and cytostatic activity of two Turkish medicinal plants *Phlomis armeniaca* and *Scutellaria salviifolia*. *Biol. Pharm. Bull.* 18, 1396–1400.
- Schmidt, T.J., Rzeppa, S., Kaiser, M., Brun, R., 2012. *Larrea tridentata* - absolute configuration of its epoxy lignans

- and investigations on its antiprotozoal activity. *Phytochem. Lett.* 5, 632-637.
- Song, Q.Y., Zhang, C.J., Li, Y., Wen, J., Zhao, X.W., Liu, Z.L., Gao, K., 2013. Lignans from the fruit of *Schisandra sphenanthera*, and their inhibition of HSV-2 and adenovirus. *Phytochem. Lett.* 6, 174–178.
- Teponno, R.B., Kusari, S., Spiteller, M., 2016. Recent advances in research on lignans and neolignans, *Natural Product Reports*.
- Thanh, V.T.T., Pham, V.C., Doan, H., Mai, T., Litaudon, M., Retailleau, P., Nguyen, V.H., Chau, V.M., 2012. Cytotoxic Lignans from Fruits of *Cleistanthus indochinensis* : Synthesis of Cleistantoxin Derivatives 22, 5–10.
- Topal, F., 2019. Anticholinergic and antidiabetic effects of isoeugenol from clove ( *Eugenia caryophyllata* ) oil. *Int. J. Food Prop.* 22, 583–592.
- Tsukamoto, Y., Ikeda, S., Uwai, K., Taguchi, R., Chayama, K., Sakaguchi, T., Narita, R., Yao, W.L., Takeuchi, F., Otakaki, Y., Watashi, K., Wakita, T., Kato, H., Fujita, T., 2018. Rosmarinic acid is a novel inhibitor for hepatitis b virus replication targeting viral epsilon RNA-polymerase interaction. *PLoS One* 13, 1–16.
- Wang, L., Li, F., Yang, C., Khan, A., Liu, X., Wang, M., 2014. Fitoterapia Neolignans , lignans and glycoside from the fruits of *Melia toosendan* 99, 92–98.
- Wu, Y.H., 2016. Naturally derived anti-hepatitis B virus agents and their mechanism of action. *World J. Gastroenterol.* 22, 188–204.
- Xu, L., Grandi, N., Del Vecchio, C., Mandas, D., Corona, A., Piano, D., Esposito, F., Parolin, C., Tramontano, E., 2015. From the traditional Chinese medicine plant *Schisandra chinensis* new scaffolds effective on HIV-1 reverse transcriptase resistant to non-nucleoside inhibitors. *J. Microbiol.* 53, 288–293.
- Xu, X.Y., Wang, D.Y., Ku, C.F., Zhao, Y., Cheng, H., Liu, K.L., Rong, L.J., Zhang, H.J., 2019. Anti-HIV lignans from *Justicia procumbens*. *Chin. J. Nat. Med.* 17, 945–952.
- Xu, X.Y., Wang, D.Y., Li, Y.P., Deyrup, S.T., Zhang, H.J., 2022. Plant-derived lignans as potential antiviral agents: a systematic review, *Phytochemistry Reviews*. Springer Netherlands.

- Yang, D.T., Lin, S. Sen, Chen, J.H., Yuan, S.T., Shi, J. Sen, Wang, J.S., Jia, A.Q., 2015. (+)- and (-)-liriodenol, a pair of novel enantiomeric lignans from *Liriodendron* hybrid. *Bioorganic Med. Chem. Lett.* 25, 1976–1978.
- Yu, J.S., Wu, Y.H., Tseng, C.K., Lin, C.K., Hsu, Y.C., Chen, Y.H., Lee, J.C., 2017. Schisandrin A inhibits dengue viral replication via upregulating antiviral interferon responses through STAT signaling pathway. *Sci. Rep.* 7, 1–12.
- Zapesochnaya, G.G., Boiko, V.A.K.V.P., Kolkhir, V.K., 1995. Phenylpropanoids as promising biologically active substances from medicinal plants. *Pharm. Chem. J.* 29, 277–280.
- Zhang, H.J., Rumschlag-Booms, E., Guan, Y.F., Liu, K.L., Wang, D.Y., Li, W.F., Nguyen, V.H., Cuong, N.M., Soejarto, D.D., Fong, H.H.S., Rong, L., 2017a. Anti-HIV diphyllin glycosides from *Justicia gendarussa*. *Phytochemistry* 136, 94–100.
- Zhang, H.J., Rumschlag-Booms, E., Guan, Y.F., Wang, D.Y., Liu, K.L., Li, W.F., Nguyen, V.H., Cuong, N.M., Soejarto, D.D., Fong, H.H.S., Rong, L., 2017b. Potent Inhibitor of Drug-Resistant HIV-1 Strains Identified from the Medicinal Plant *Justicia gendarussa*. *J. Nat. Prod.* 80, 1798–1807.
- Zhao, Y., Geng, C.A., Ma, Y.B., Huang, X.Y., Chen, H., Cao, T.W., He, K., Wang, H., Zhang, X.M., Chen, J.J., 2014. UFLC/MS-IT-TOF guided isolation of anti-HBV active chlorogenic acid analogues from *Artemisia capillaris* as a traditional Chinese herb for the treatment of hepatitis. *J. Ethnopharmacol.* 156, 147–154.
- Zhou, B., Bahler, B.D., Hofmann, G.A., Mattern, M.R., Johnson, R.K., Kingston, D.G.I., 1998. Phenylethanoid Glycosides from *Digitalis purpurea* and *Penstemon linarioides* with PKC  $\alpha$ -Inhibitory Activity. *J. Nat. Prod.* 61, 1410–1412.

**Table S3.** Docking Scores of selected phenylpropanoids & phenylethanoids within three proteins of *P. falciparum*.

| ID | Molecule Structure                                                                                    | 1V0P <sup>a</sup> |                   | 4PD4 <sup>b</sup> |      | 6AGT <sup>c</sup> |      |
|----|-------------------------------------------------------------------------------------------------------|-------------------|-------------------|-------------------|------|-------------------|------|
|    |                                                                                                       | S <sub>g</sub>    | RMSD <sub>h</sub> | S                 | RMSD | S                 | RMSD |
| 1  | 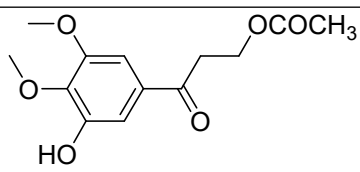<br>Feddeiketone A   | -5.48             | 1.68              | -6.37             | 2.29 | -7.33             | 1.24 |
| 2  | <br>Feddeiphenol A   | -7.10             | 1.61              | -7.04             | 1.51 | -6.48             | 1.58 |
| 3  | <br>Feddeiphenol C  | -7.22             | 1.69              | -7.47             | 1.71 | -8.87             | 1.83 |
| 4  | <br>Feddeiphenol D | -6.75             | 2.48              | -8.20             | 1.49 | -8.68             | 1.47 |

|   |                                                                                                                                        |       |      |       |      |       |      |
|---|----------------------------------------------------------------------------------------------------------------------------------------|-------|------|-------|------|-------|------|
|   | Surinamensin                                                                                                                           |       |      |       |      |       |      |
| 5 | 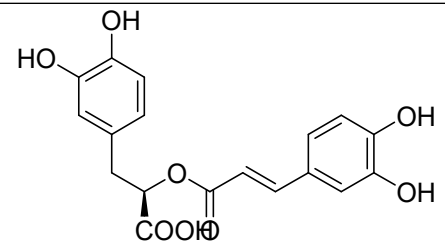 <p style="text-align: center;">Rosmarinic acid</p>   | -6.26 | 1.79 | -7.73 | 1.19 | -7.34 | 1.35 |
| 6 |  <p style="text-align: center;">Ethyl rosmarinate</p> | -6.94 | 1.65 | -7.33 | 1.55 | -7.34 | 1.02 |
| 7 |  <p style="text-align: center;">Cubebin</p>          | -6.2  | 1.56 | -7.02 | 1.72 | -8.24 | 0.82 |
| 8 |  <p style="text-align: center;">Isocubebin</p>      | -6.13 | 1.26 | -7.39 | 1.55 | -7.88 | 1.89 |

|    |                                                                                                                |       |      |       |      |       |      |
|----|----------------------------------------------------------------------------------------------------------------|-------|------|-------|------|-------|------|
| 9  | 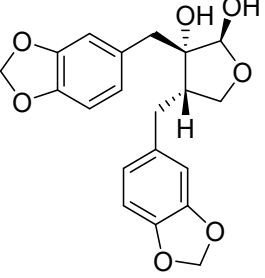 <p>Glandularin</p>           | -6.43 | 1.84 | -7.67 | 1.89 | -7.89 | 1.78 |
| 10 |  <p>Forsythoside A</p>        | -8.31 | 2.47 | -8.41 | 1.44 | -7.65 | 2.16 |
| 11 |  <p>Shimobashiric acid B</p> | -6.33 | 1.52 | -7.48 | 1.57 | -7.80 | 1.10 |
| 12 |  <p>L-Chicoric acid</p>     | -7.65 | 1.29 | -7.56 | 1.69 | -8.38 | 1.49 |

|    |                                                                                                                            |       |      |       |      |       |      |
|----|----------------------------------------------------------------------------------------------------------------------------|-------|------|-------|------|-------|------|
| 13 | 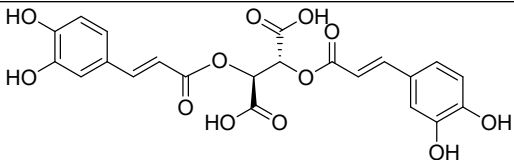 <p>Di-E-caffeoyl-meso-tartaric acid</p> | -6.32 | 1.82 | -8.50 | 1.32 | -7.29 | 1.12 |
| 14 |  <p>Usneidone E</p>                       | -6.94 | 2.64 | -8.10 | 1.28 | -5.98 | 1.59 |
| 15 |  <p>Niranthin</p>                         | -7.07 | 1.71 | -7.13 | 1.21 | -7.04 | 1.33 |
| 16 |  <p>Kadangustin H</p>                    | -6.52 | 1.97 | -9.35 | 1.62 | -8.87 | 0.93 |



|    |                                                                                                                                            |       |      |       |      |       |      |
|----|--------------------------------------------------------------------------------------------------------------------------------------------|-------|------|-------|------|-------|------|
| 17 | 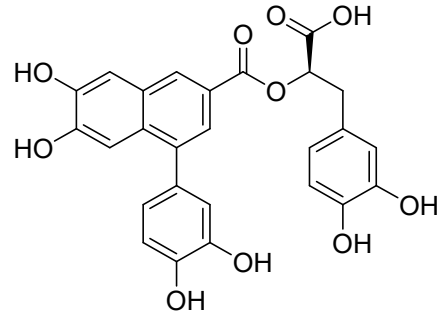 <p style="text-align: center;">Globoidnan A</p>          | -7.71 | 1.51 | -7.70 | 1.78 | -9.20 | 1.44 |
| 18 |  <p style="text-align: center;">Retrojusticidin B</p>     | -6.53 | 2.52 | -5.75 | 1.03 | -7.66 | 1.62 |
| 19 |  <p style="text-align: center;">(-)-Isolariciresinol</p> | -7.01 | 1.55 | -5.00 | 1.48 | -6.84 | 1.06 |

|    |                                                                                                       |       |      |       |      |       |      |
|----|-------------------------------------------------------------------------------------------------------|-------|------|-------|------|-------|------|
| 20 | 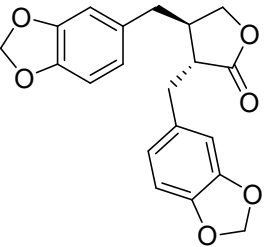 <p>Hinokinin</p>    | -5.99 | 1.21 | -7.12 | 1.68 | -7.55 | 1.97 |
| 21 |  <p>Savinin</p>      | -6.58 | 1.84 | -6.15 | 2.15 | -6.78 | 0.98 |
| 22 |  <p>Sesamin</p>     | -6.01 | 2.09 | -7.61 | 1.57 | -7.73 | 1.72 |
| 23 |  <p>Vladinol F</p> | -6.59 | 2.09 | -7.03 | 1.54 | -7.88 | 0.93 |

|    |                                                                                                       |                    |      |                    |      |                    |      |
|----|-------------------------------------------------------------------------------------------------------|--------------------|------|--------------------|------|--------------------|------|
| 24 | 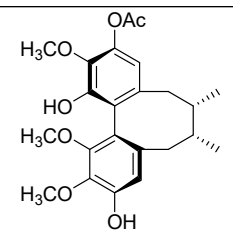<br>Neglectalignan A | -6.47              | 2.15 | -5.84              | 0.81 | -7.26              | 1.05 |
| 25 | <br>Peperomin A      | -7.06              | 1.76 | -7.69              | 0.87 | -6.39              | 1.4  |
| #  | <b>Co-crystallized Ligand</b>                                                                         | -7.32 <sup>d</sup> | 2.10 | -6.91 <sup>e</sup> | 1.63 | -7.98 <sup>f</sup> | 0.63 |

<sup>a</sup>1V0P: *P. falciparum* kinase; <sup>b</sup>4PD4: cytochrome bc1; and <sup>c</sup>6AGT: lysyl-tRNA synthetase (PfKRS1) active sites; <sup>d</sup>Purvalanol B (PVB); <sup>e</sup>2-[trans-4-(4-chlorophenyl)cyclohexyl]-3-hydroxynaphthalene-1,4-dione (AOQ); <sup>f</sup>N-(cyclohexylmethyl)-4-oxo-4H-1-benzopyran-2-carboxamide (9X0); <sup>g</sup>Docking Score (S; Kcal/mol); <sup>h</sup>Root-Mean Square Deviation (Å)

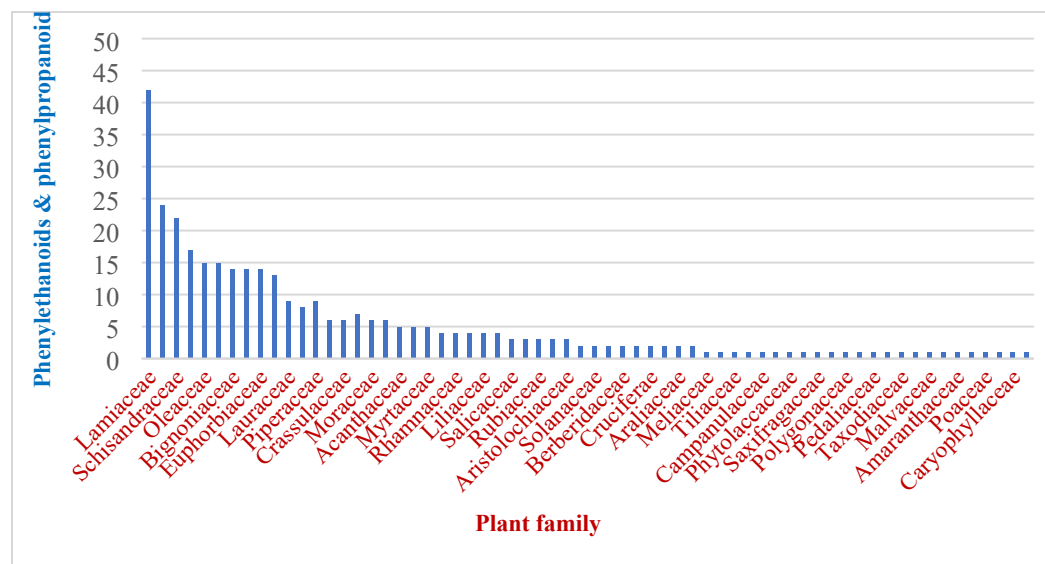

**Fig. S1.** Distribution of the investigated 261 compounds in different plant families

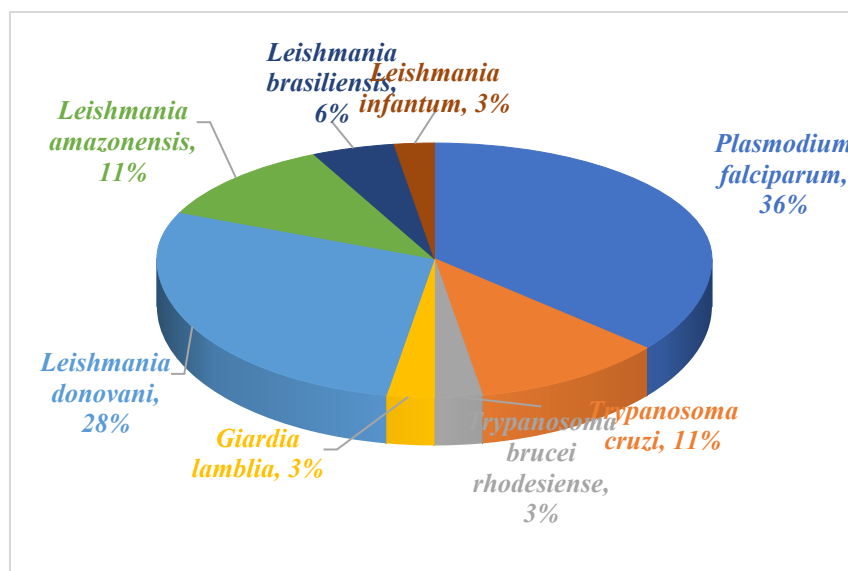

**Fig. S2.** Different antiprotozoal activity of 27 compounds out of the investigated 261 compounds

**Feddeiphenol A**

**Feddeiphenol C**

**Forsythoside A**

**L-Chicoric acid**

**Niranthin**

**Globoidnan A**

**(-)-Isolariciresinol**

**Peperomin A**

**PVB**

**Fig. S3.** Presumptive mode of interaction of test molecules and PVB within active site of *P. falciparum* kinase (PDB ID: 1V0P)



**Rosmarinic acid**

**Forsythoside A**

**Di-E-caffeoyl-meso-tartaric acid**

**Globoidnan A**

**Sesamin**

**AOQ**

**Fig S4.** Presumptive mode of interaction of test molecules and AOQ within active site of *P. falciparum* mitochondrial cytochrome bc1 complex (PDB ID: 4PD4).

**Feddeiphenol C**

**Surinamensin**

**Kadangustin H**

**Globoidnan A**

**9X0**

**Fig. S5.** Presumptive mode of interaction of test molecules and 9X0 within active site of *P. falciparum* lysyl-tRNA synthetase (PfKRS1; PDB ID: 6AGT)
